# Supplementary material for: A conditional knockout rat resource of mitochondrial protein-coding genes via a DdCBE-induced premature stop codon
Source: PubMed Central journal article supplement — Sci Adv. 2023 Apr 14;9(15):eadf2695. doi: 10.1126/sciadv.adf2695 (PMC10104465; doi:10.1126/sciadv.adf2695), 2023-04-14
Supplement: sciadv.adf2695_sm.pdf [file sciadv.adf2695_sm.pdf]

Supplementary Materials for  
**A conditional knockout rat resource of mitochondrial protein-coding genes  
via a DdCBE-induced premature stop codon**

Lei Tan *et al.*

Corresponding author: Yuanwu Ma, [mayuanwu@cnilas.org](mailto:mayuanwu@cnilas.org); Bin Shen, [binshen@njmu.edu.cn](mailto:binshen@njmu.edu.cn)

*Sci. Adv.* **9**, eadf2695 (2023)  
DOI: 10.1126/sciadv.adf2695

**This PDF file includes:**

Figs. S1 to S12  
Tables S1 to S3  
Sequences S1 and S2

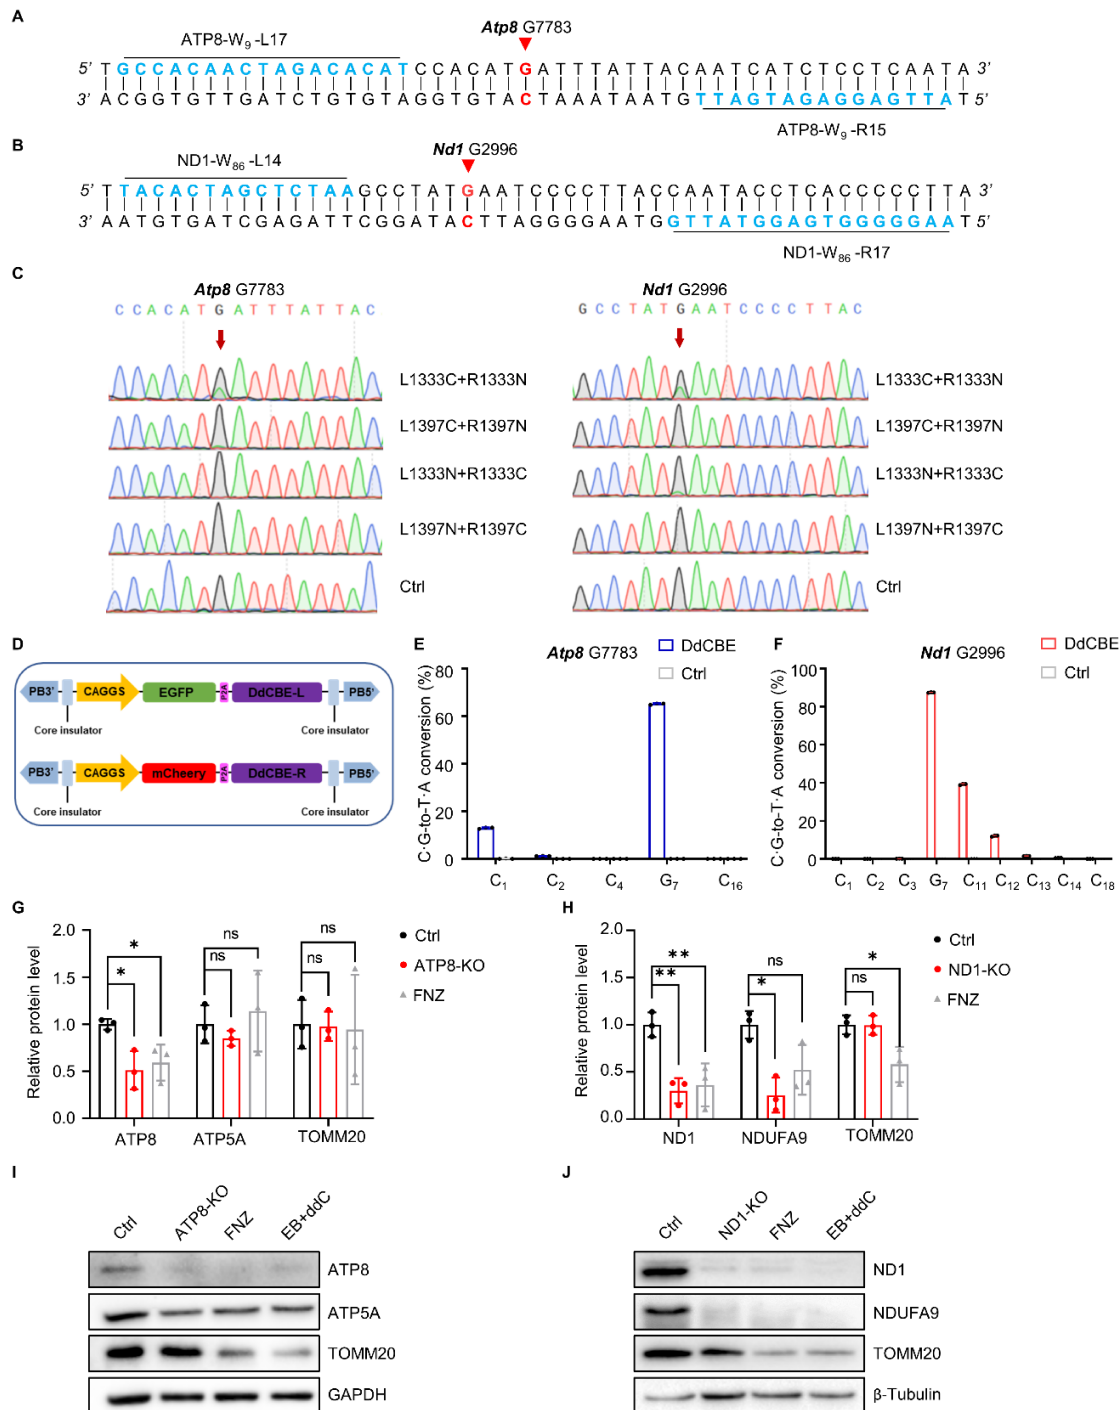

**Fig. S1.**

**Screening efficient DdCBE pair for *Atp8* and *Nd1* targeting.**

(A and B) Design overview of TALEs targeting rat *Atp8* G7783 site (A) and *Nd1* G2996 site (B). (C) The editing efficiency of four DdCBE pairs (L1333C + R1333N, L1397C + R1397N, L1333N + R1333C, and L1397N + R1397C) for *Atp8* G7783 site and *Nd1* G2996 site were analyzed by Sanger sequencing. (D) DdCBE pair with best performance was cloned into PB

vector with EGFP or mCherry tags. **(E and F)** The frequencies of C•G to T•A conversion at *Atp8* G7783 site (E) and *Ndl* G2996 site (F) were analyzed by deep sequencing. n = 3 technical replicates. Data were presented as means  $\pm$  SD. **(G and H)** The qualitative analysis of protein expression in treated C6 cells from Figure 1I and Figure 1J. n = 3 technical replicates. Data were presented as means  $\pm$  SD. ns, not significant,  $*P \leq 0.05$ ,  $**P \leq 0.01$ ,  $***P \leq 0.001$ ,  $****P \leq 0.0001$  by one-way ANOVA test paired with a Tukey's Honest Significant Difference. **(I and J)** The protein level was detected by western blot in C6 cells treated with DdCBE, FNZ, or EB + ddC.

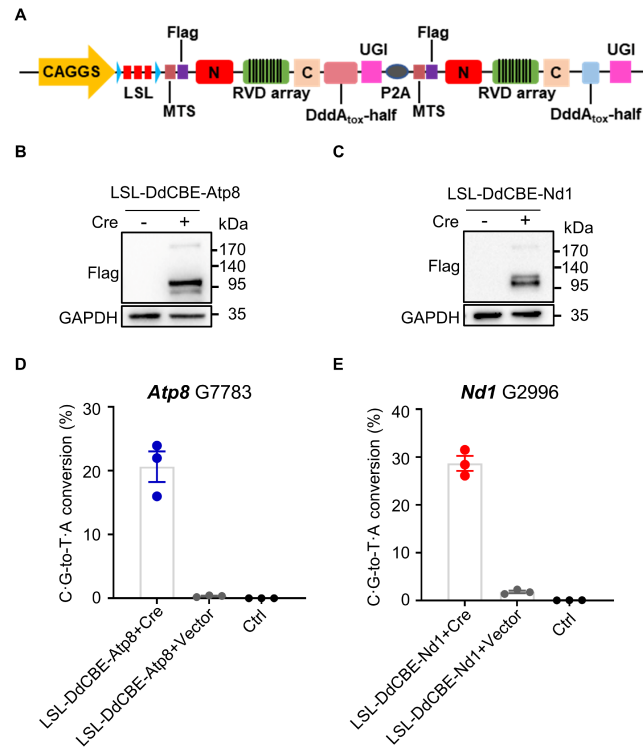

**Fig. S2.**

**Construct a Cre-inducible DdCBE system in C6 cells.**

(A) Schematic overview of Cre-inducible DdCBE system. The inducible DdCBE plasmid (LSL-DdCBE) contains a CAG promoter, two *loxP* sites flanking a triple repeat of poly(A) sequence, and a DdCBE pair linked by P2A peptides. (B and C) Expression of DdCBE for *Atp8* G7783 site (B) and *Ndl* G2996 site (C) were analyzed by western blot after 48h co-transfection of LSL-DdCBE plasmid with or without *Cre* plasmid. (D and E) The frequency of DdCBE-mediated C•G to T•A conversion at *Atp8* G7783 site (D) and *Ndl* G2996 site (E) were analyzed by deep sequencing. n = 3 biological replicates for each group, biological replicates. Data were presented as means ± SD.

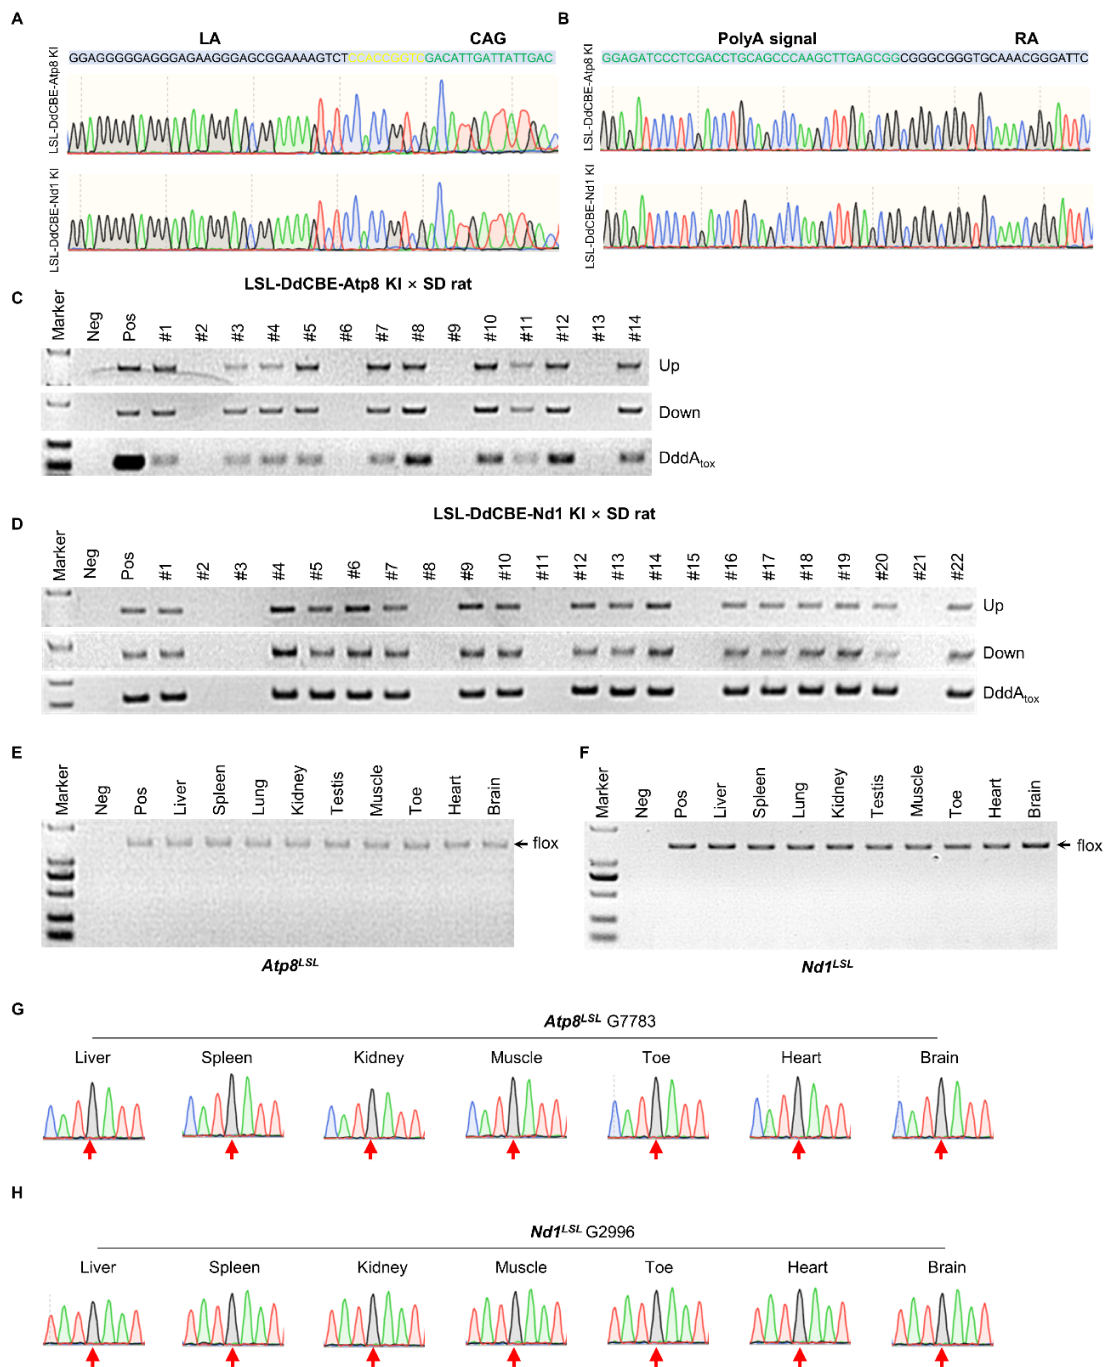

**Fig. S3.**

**The germline transmission of LSL-DdCBE KI rats.**

**(A and B)** The correct recombination of LSL-DdCBE cassettes were confirmed by Sanger sequencing for LA (A) and RA (B) in LSL-DdCBE-Atp8 KI F<sub>0</sub> rats and LSL-DdCBE-Nd1 KI F<sub>0</sub> rats. **(C and D)** Genotyping of LSL-DdCBE-Atp8 KI F<sub>1</sub> rats (C) and LSL-DdCBE-Nd1 KI F<sub>1</sub> rats (D) were analyzed using PCR with Up, Down, and DddA<sub>tox</sub> primer pairs. **(E and F)** The LSL element in various tissues of LSL-DdCBE-Atp8 KI F<sub>1</sub> rat (E) and LSL-DdCBE-Nd1 KI F<sub>1</sub> rat (F) were analyzed using PCR with the loxP primer pair. **(G and H)** Sanger sequencing for *Atp8* G7783

site (G) and *Ndl* G2996 site (H) in various tissues of LSL-DdCBE-Atp8 KI F<sub>1</sub> rat and LSL-DdCBE-Nd1 KI F<sub>1</sub> rat.

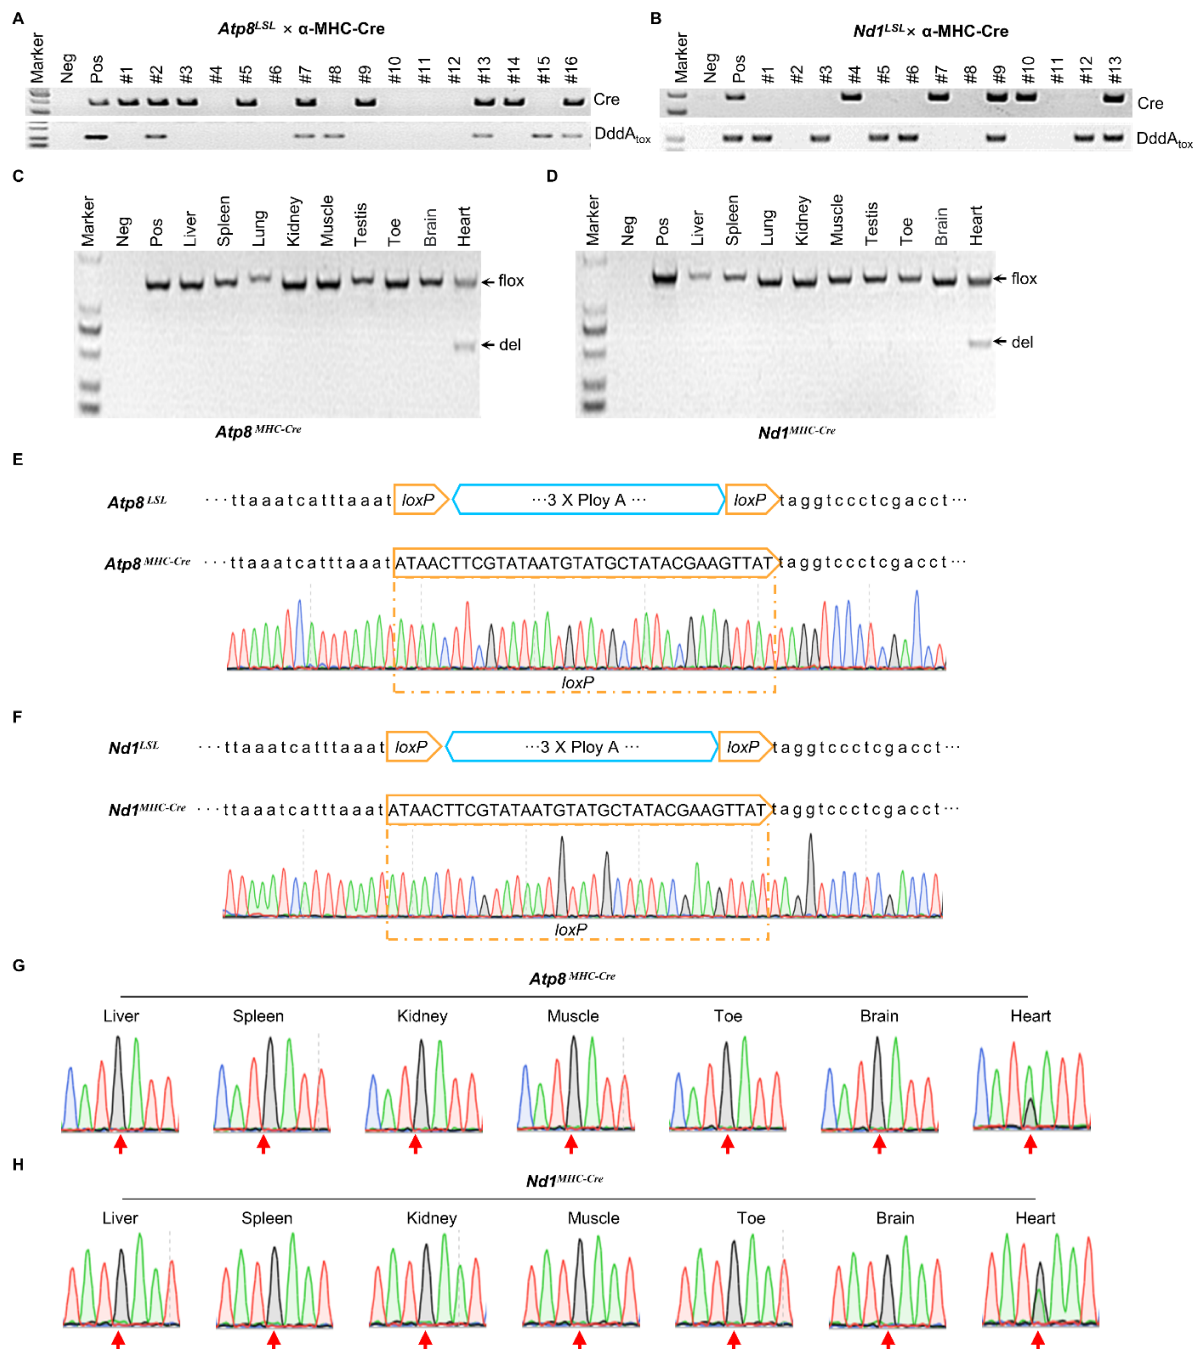

**Fig. S4.**

**Heart-specific depletion of ATP8/ND1 using  $\alpha$ -MHC-Cre rats.**

(**A and B**) Genotyping of the offspring produced from *Atp8*<sup>LSL</sup> ×  $\alpha$ -MHC-Cre rats (**A**) and *Nd1*<sup>LSL</sup> ×  $\alpha$ -MHC-Cre rats (**B**) using Cre and DddA<sub>tox</sub> primer pairs. (**C and D**) The LSL element in various tissues of *Atp8*<sup>MHC-Cre</sup> rat (**C**) and *Nd1*<sup>MHC-Cre</sup> rat (**D**) was analyzed using the loxP primer pair. (**E and F**) Cre-mediated LSL deletion in heart tissues of *Atp8*<sup>MHC-Cre</sup> rat (**E**) and *Nd1*<sup>MHC-Cre</sup> rat (**F**) were confirmed by Sanger sequencing. (**G and H**) Sanger sequencing for *Atp8* G7783 site (**G**) and *Nd1* G2996 site (**H**) in various tissues of *Atp8*<sup>MHC-Cre</sup> and *Nd1*<sup>MHC-Cre</sup> rats.

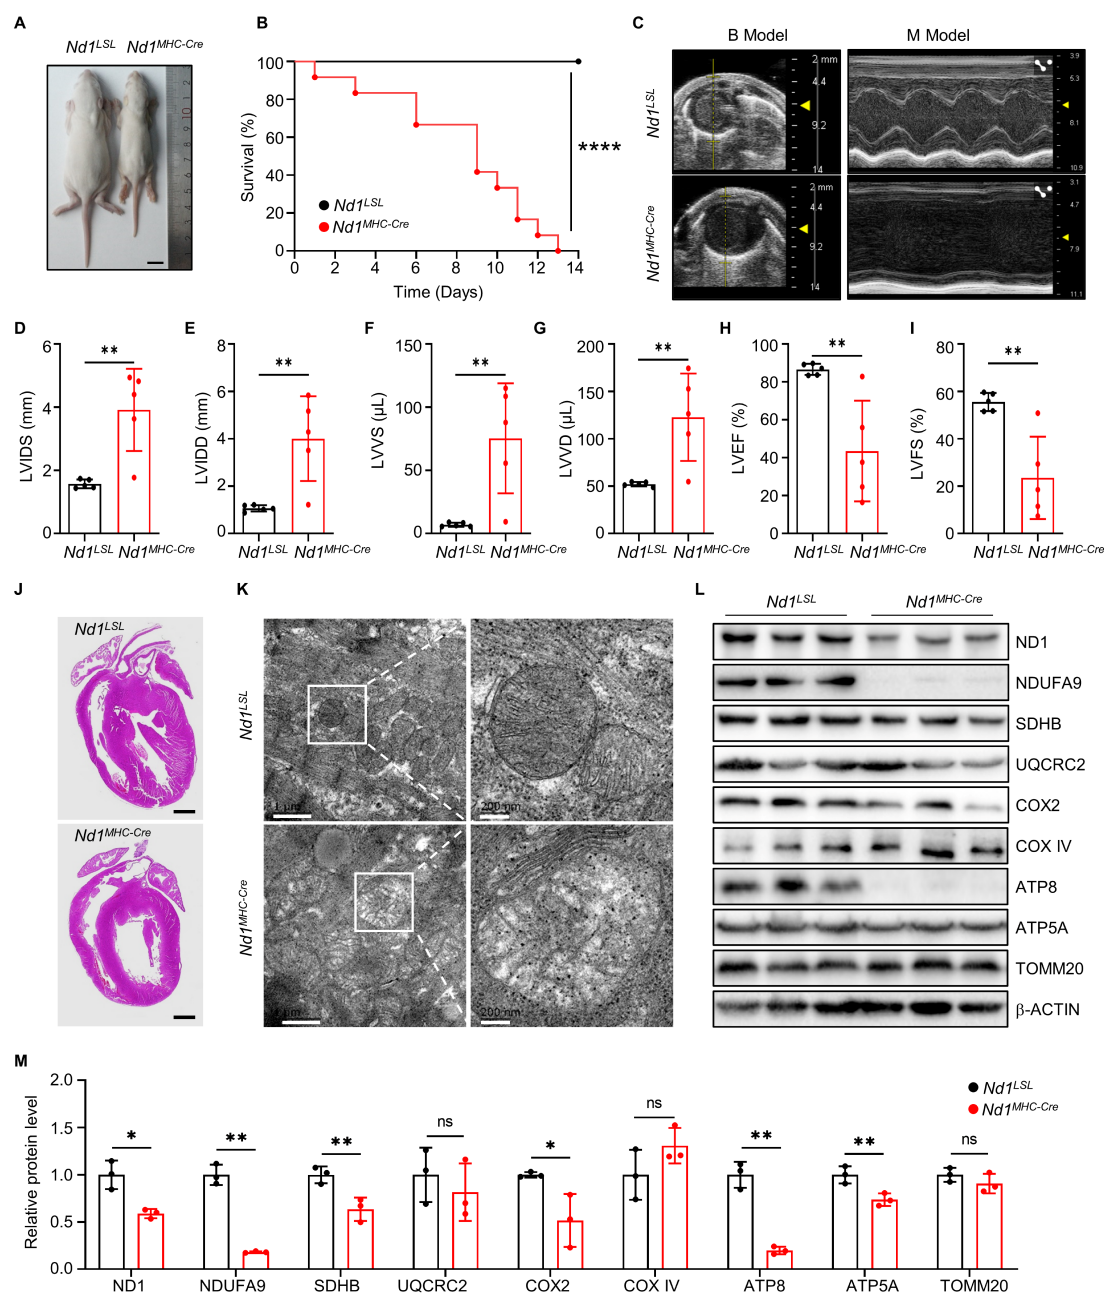

**Fig. S5.**

**Heart-specific depletion of ND1 causes heart failure in rats.**

(A) The whole-body image of ten-day-age *Nd1<sup>LSL</sup>* and *Nd1<sup>MHC-Cre</sup>* pups. Scale bar, 1 cm. (B) The survival curve of *Nd1<sup>LSL</sup>* and *Nd1<sup>MHC-Cre</sup>* rats.  $n = 10$  biological replicates for each group.  $****P \leq 0.0001$  by Log-rank test. (C) The snap shot of echocardiography for *Nd1<sup>LSL</sup>* and *Nd1<sup>MHC-Cre</sup>* rats. (D to I) The cardiac structure and function parameters of *Nd1<sup>LSL</sup>* and *Nd1<sup>MHC-Cre</sup>* rats calculated from echocardiography in (C). Left ventricular (LV) diameter at end of systole (LVIDS) (D) and diastole (LVIDD) (E); LV volume at end of systole (LVVS) (F) and diastole (LVVD) (G); LV ejection fraction (LVEF) (H); LV percentage fractional shortening (LVFS) (I).  $n = 5$  biological replicates for each group. Data were presented as means  $\pm$  SD.  $**P \leq 0.01$  by Student's unpaired



two-tailed *t*-test. **(J)** The H&E image of heart tissue from *Ndl<sup>LSL</sup>* and *Ndl<sup>MHC-Cre</sup>* rats. Scale bar, 1 mm. **(K)** The TEM image of mitochondria in heart tissue of *Ndl<sup>LSL</sup>* and *Ndl<sup>MHC-Cre</sup>* rats. **(L and M)** The mitochondrial protein level in heart tissues of *Ndl<sup>LSL</sup>* and *Ndl<sup>MHC-Cre</sup>* rats were analyzed by western blot (L) and quantification (M). *n* = 3 biological replicates for each group. Data were presented as means ± SD. ns, not significant, \**P* ≤ 0.05, \*\**P* ≤ 0.01 by Student's unpaired two-tailed *t*-test.

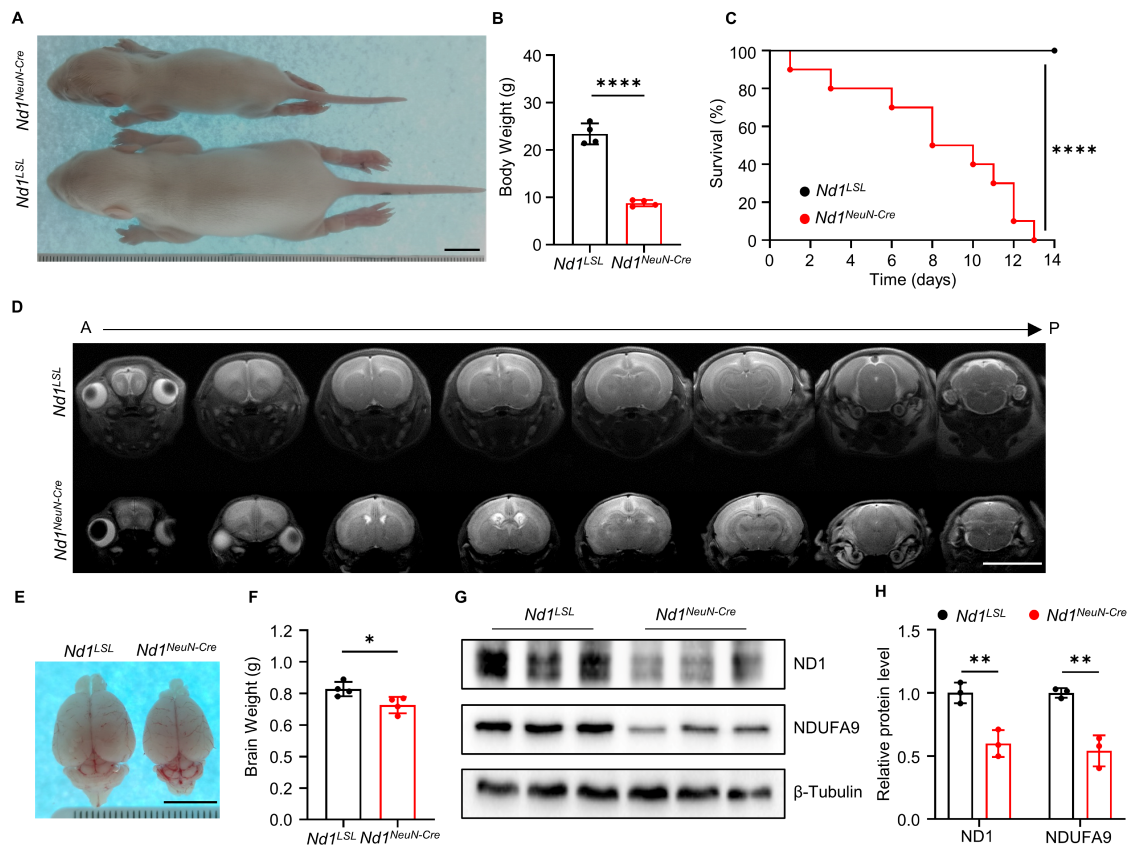

**Fig. S6.**

**Neuron-specific knockout ND1 results in postnatal death in rats.**

(A) The whole-body image of *Nd1<sup>LSL</sup>* and *Nd1<sup>NeuN-Cre</sup>* rats. Scale bar, 1 cm. (B) the body weight of *Nd1<sup>LSL</sup>* and *Nd1<sup>NeuN-Cre</sup>* rats.  $n = 4$  biological replicates for each group. \*\*\*\* $P \leq 0.0001$  by Student's unpaired two-tailed  $t$ -test. (C) The survival curve of *Nd1<sup>LSL</sup>* and *Nd1<sup>NeuN-Cre</sup>* rats.  $n = 10$  biological replicates for each group. \*\*\*\* $P \leq 0.0001$  by Log-rank test. (D) The brain MRI image of *Nd1<sup>LSL</sup>* and *Nd1<sup>NeuN-Cre</sup>* rats from anterior (A) to posterior (P). Scale bar, 1 cm. (E) The brain image of *Nd1<sup>LSL</sup>* and *Nd1<sup>NeuN-Cre</sup>* rats. Scale bar, 1 cm. (F) The brain weight of *Nd1<sup>LSL</sup>* and *Nd1<sup>NeuN-Cre</sup>* rats.  $n = 4$  biological replicates for each group. \*\*\*\* $P \leq 0.0001$  by Student's unpaired two-tailed  $t$ -test. (G and H) The protein level of ND1 and NDUFA9 in brain tissue of *Nd1<sup>LSL</sup>* and *Nd1<sup>NeuN-Cre</sup>* rats were analyzed by western blot (G) and quantification (H).  $n = 3$  biological replicates for each group. Data were presented as means  $\pm$  SD. \*\* $P \leq 0.01$  by Student's unpaired two-tailed  $t$ -test.

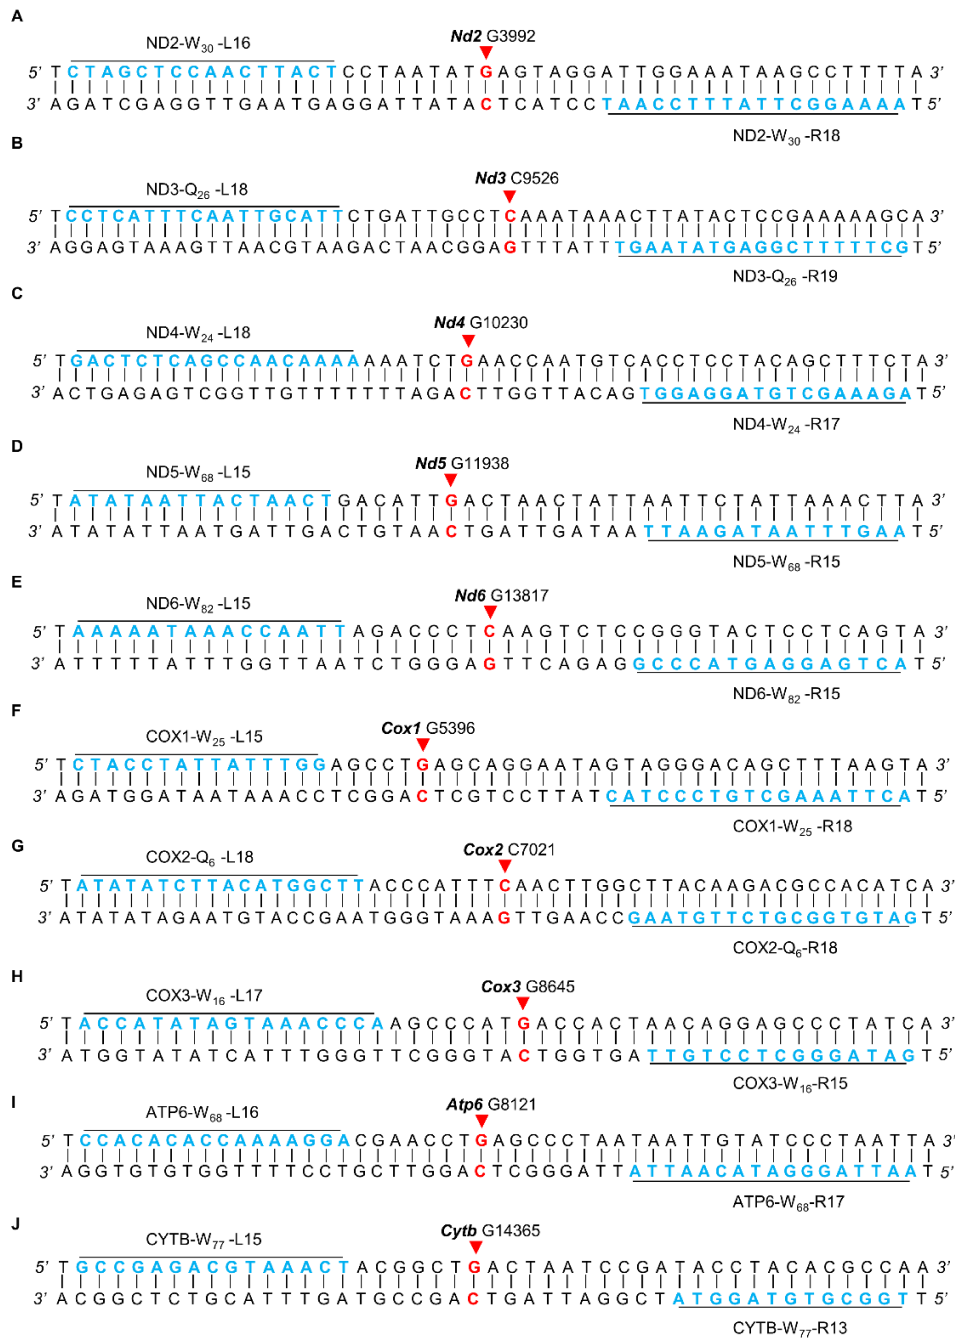

**Fig. S7.**

**Design of knockout all rat mtDNA protein-coding genes.**

(A to J) Design overview of DdCBEs for *Nd2* G3992 (A), *Nd3* C9526 (B), *Nd4* G10230 (C), *Nd5* G11938 (D), *Nd6* G13817 (E), *Cytb* G14365 (F), *Cox1* G5396 (G), *Cox2* C7021 (H), *Cox3* G8645 (I), and *Atp6* G8121 (J) sites.

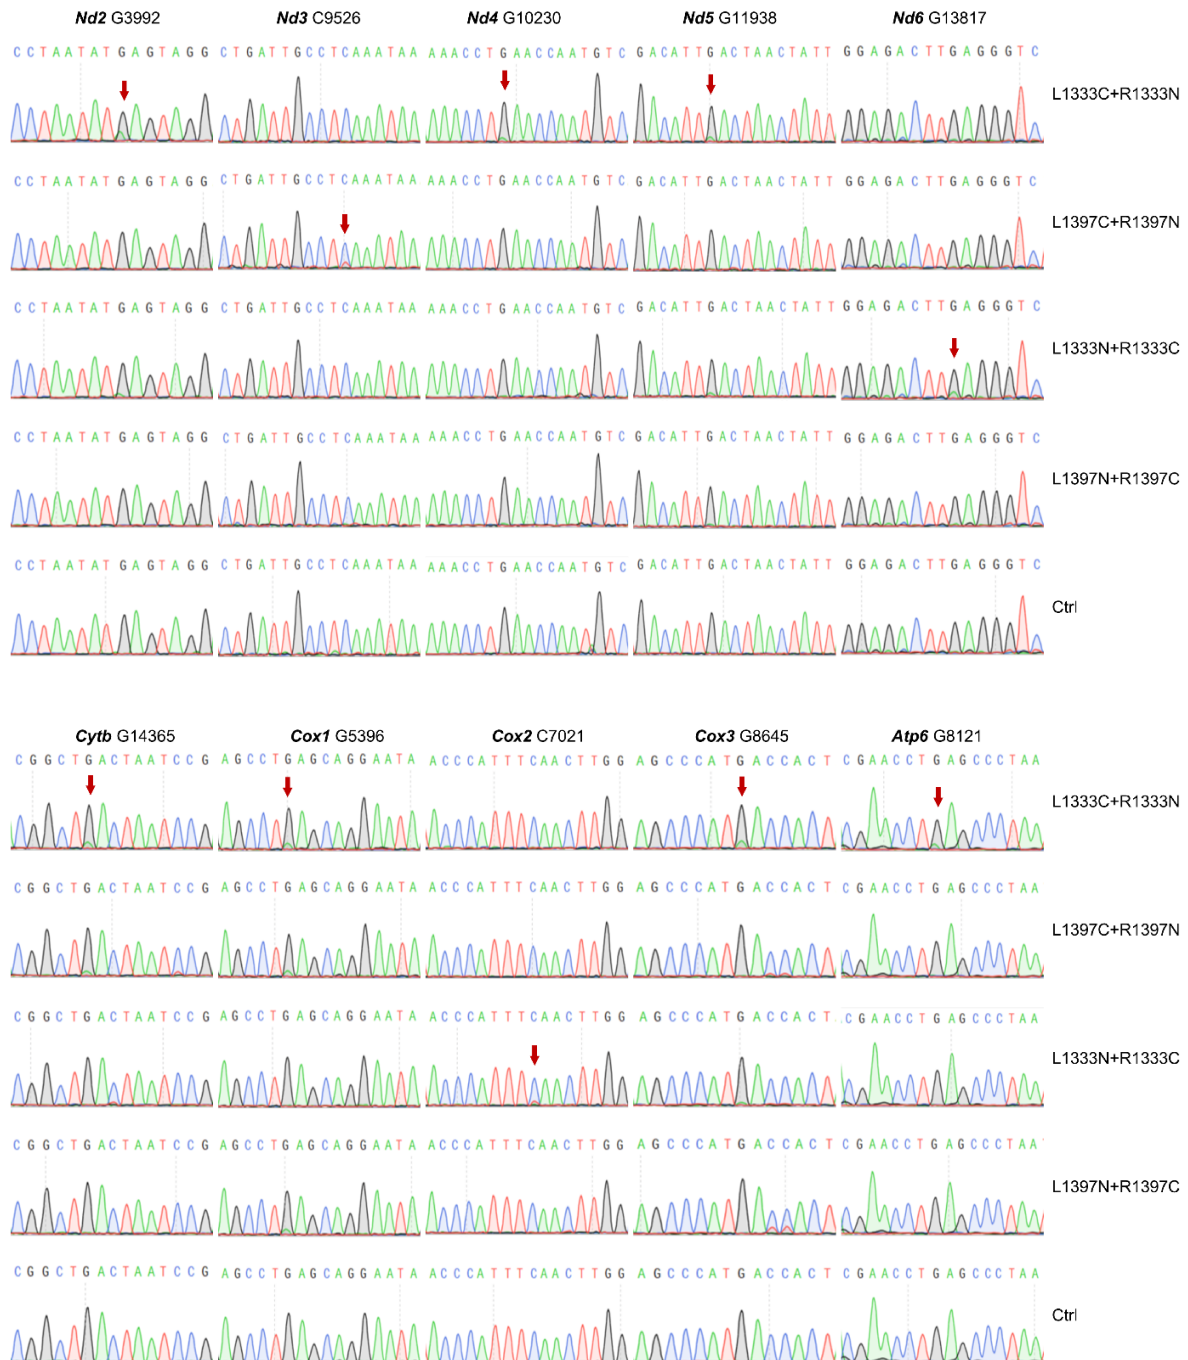

**Fig. S8.**

**Screening of efficient DdCBE pairs for targeting mtDNA protein-coding genes in C6 cells.**

Sanger sequencing for *Nd2* G3992, *Nd3* C9526, *Nd4* G10230, *Nd5* G11938, *Nd6* G13817, *Cytb* G14365, *Cox1* G5396, *Cox2* C7021, *Cox3* G8645, and *Atp6* G8121 sites in C6 cells transfected with four DdCBE pairs for each target site.

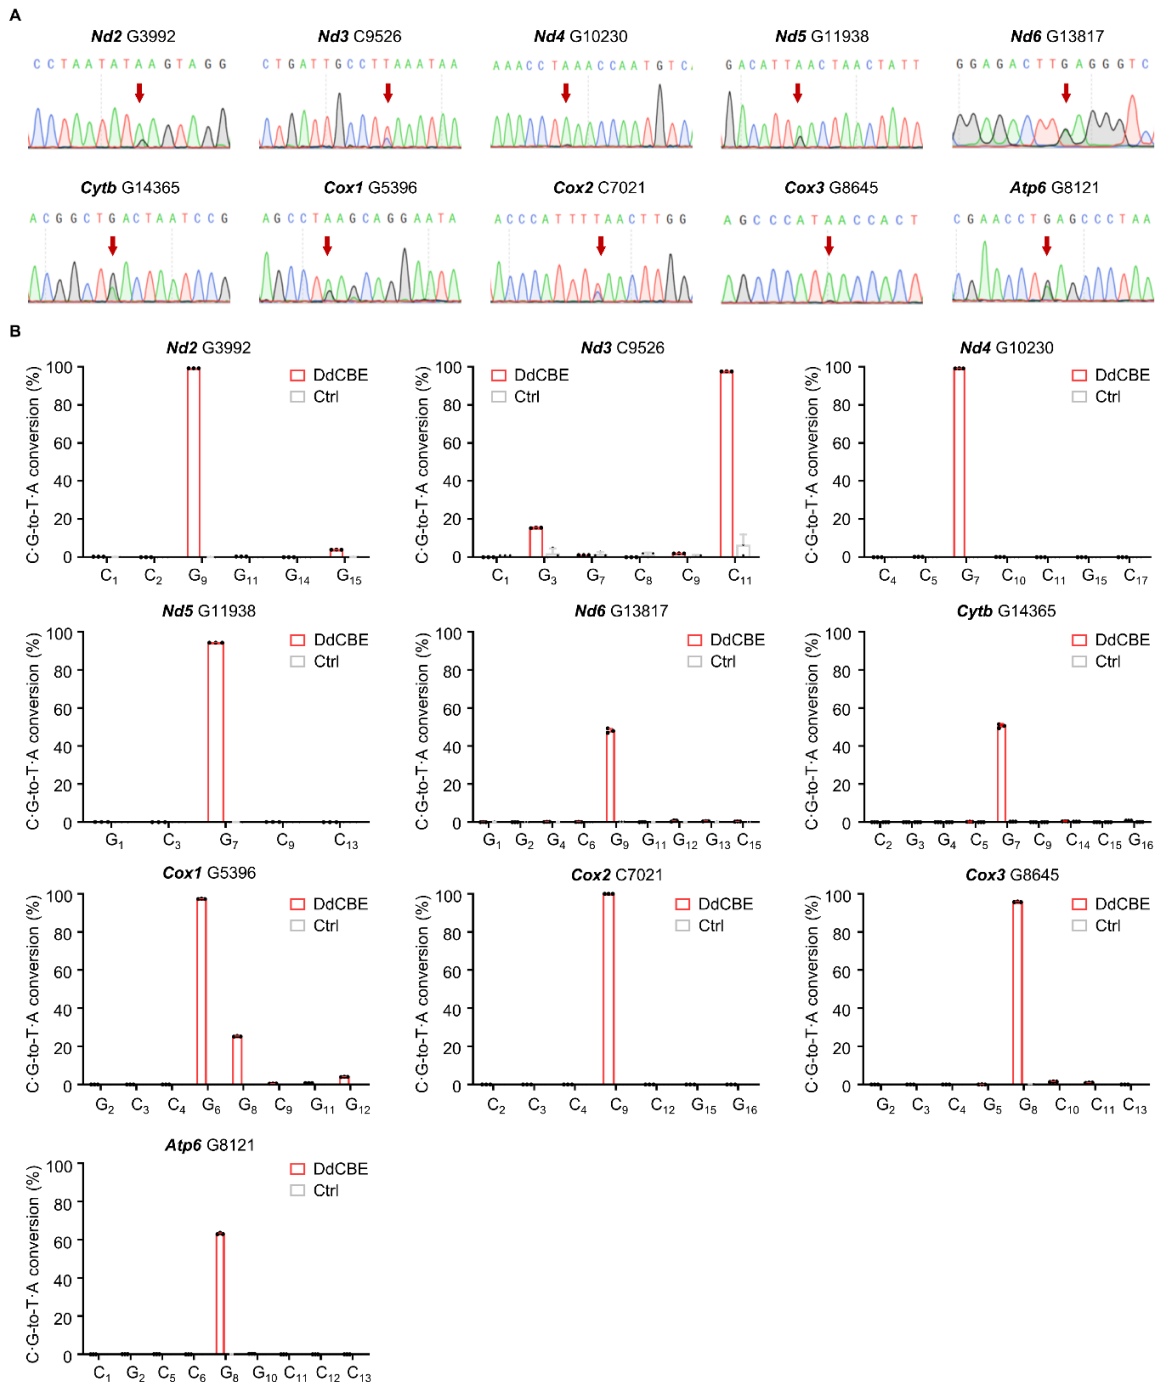

**Fig. S9.**

**The editing efficiency of DdCBE for rat mtDNA protein-coding genes in C6 cells.**

(A) Sanger sequencing for *Nd2* G3992, *Nd3* C9526, *Nd4* G10230, *Nd5* G11938, *Nd6* G13817, *Cytb* G14365, *Cox1* G5396, *Cox2* C7021, *Cox3* G8645, and *Atp6* G8121 sites in PB-DdCBE plasmids transfected C6 cells. (B) The frequency of C•G to T•A conversion in the spacer region of *Nd2* G3992, *Nd3* C9526, *Nd4* G10230, *Nd5* G11938, *Nd6* G13817, *Cytb* G14365, *Cox1* G5396, *Cox2* C7021, *Cox3* G8645, and *Atp6* G8121 sites was analyzed by deep sequencing. n = 3 technical replicates. Data were presented as means ± SD.

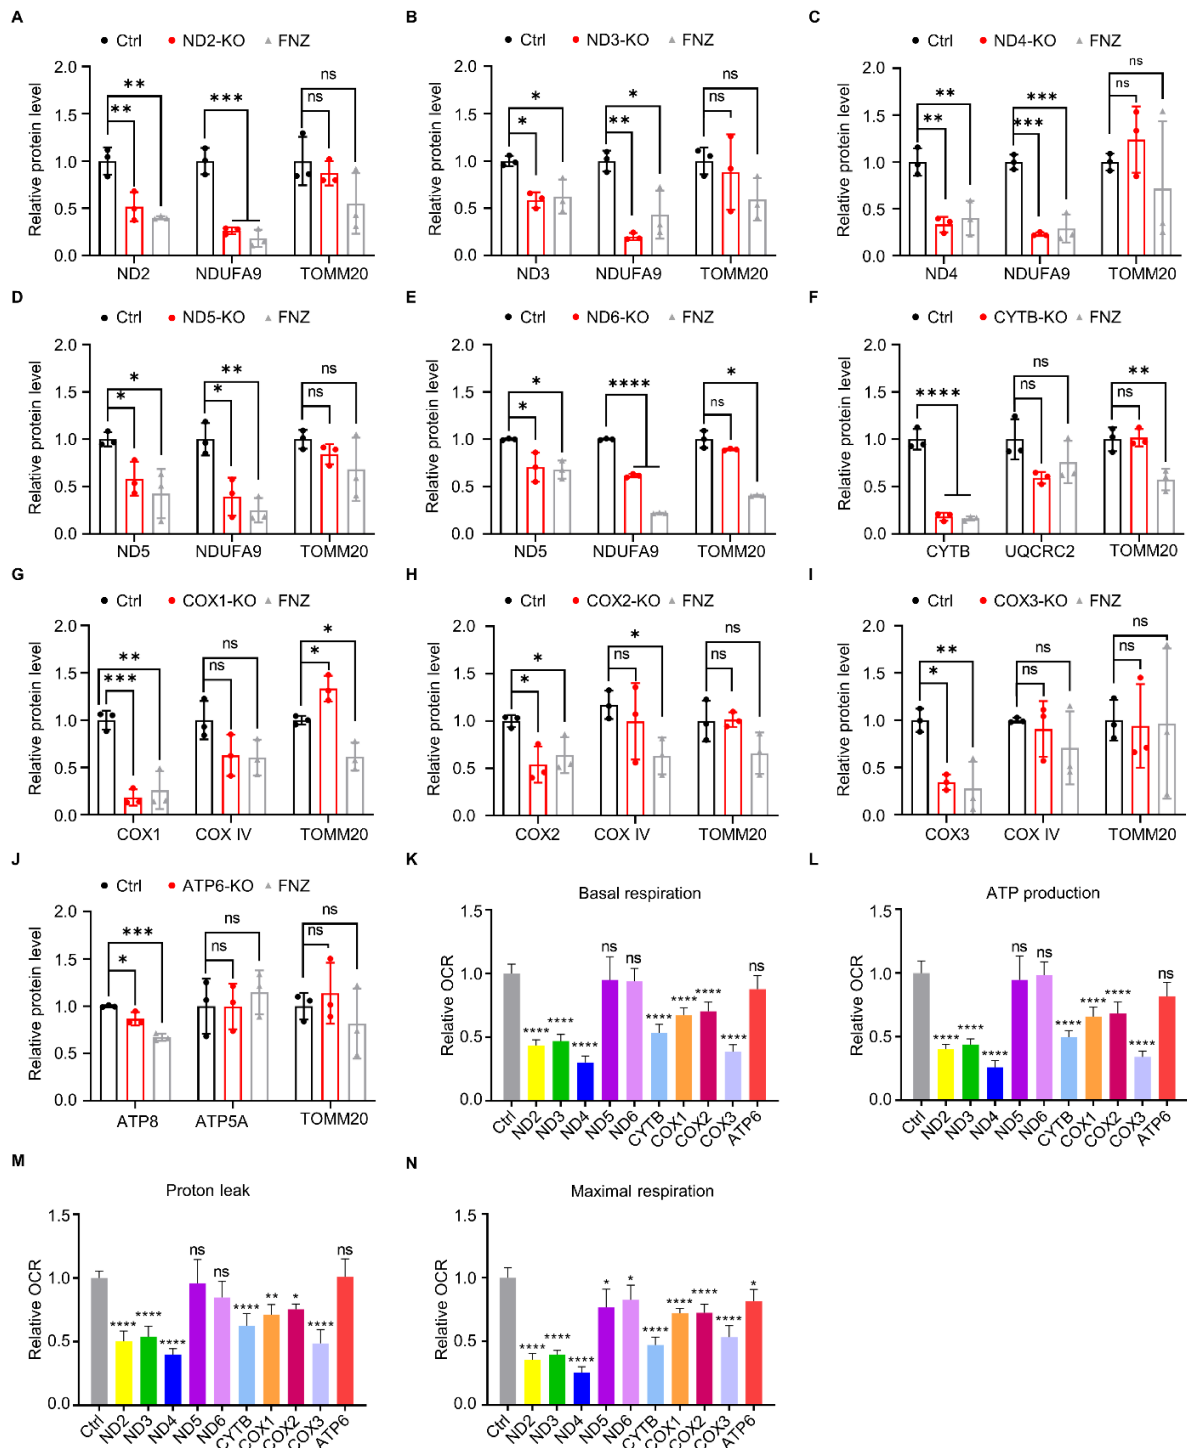

**Fig. S10.**

**Depletion of mtDNA-encoded proteins in C6 cells.**

(A to J) The quantitative analysis of protein expression in ND2-KO (A), ND3-KO (B), ND4-KO (C), ND5-KO (D), ND6-KO (E), CYTB-KO (F), COX1-KO (G), COX2-KO (H), COX3-KO (I), and ATP6-KO (J) C6 cells from Figure 5I to 5L. n = 3 technical replicates. Data were presented

as means  $\pm$  SD. ns, not significant,  $*P \leq 0.05$ ,  $**P \leq 0.01$ ,  $***P \leq 0.001$ ,  $****P \leq 0.0001$  by one-way ANOVA test paired with a Tukey's Honest Significant Difference. **(K to N)** Relative values of OXPFOX parameters from Figure 5C to 5L. n = 5 technical replicates for Ctrl and n = 6 technical replicates for each KO cell line. Data were presented as means  $\pm$  SD. ns, not significant,  $*P \leq 0.05$ ,  $**P \leq 0.01$ ,  $***P \leq 0.001$ , and  $****P \leq 0.0001$  by one-way ANOVA test paired with a Tukey's Honest Significant Difference.

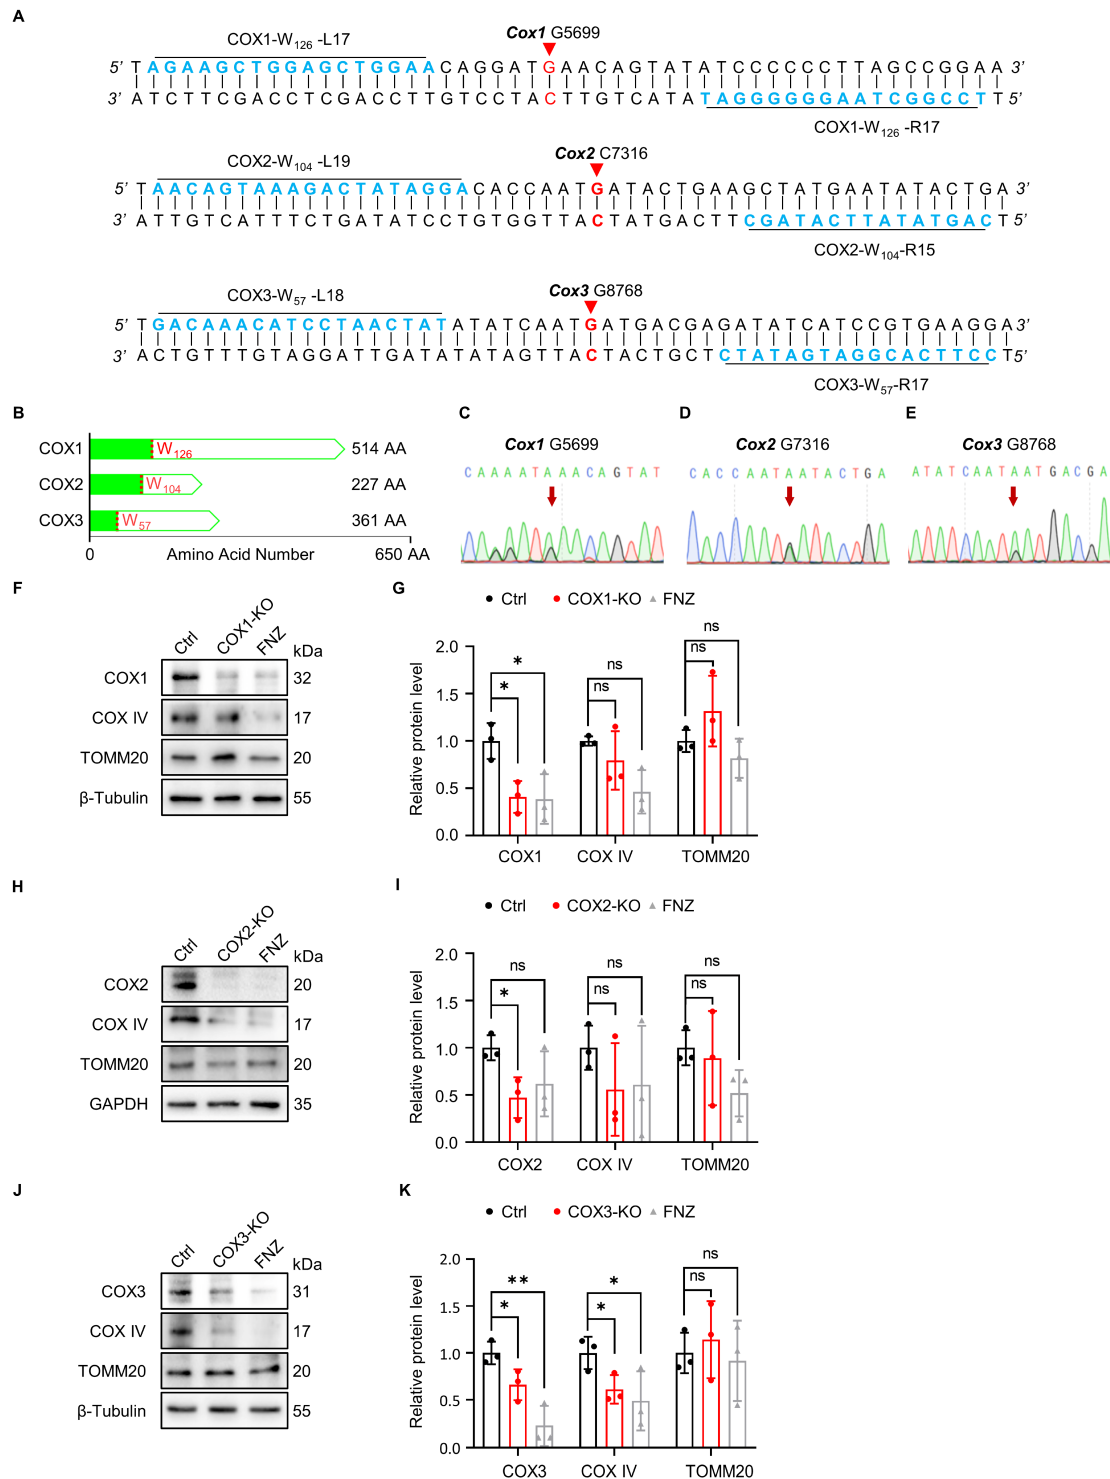

**Fig. S11.**

**Depletion of mtDNA-encoded COXs in C6 cells.**

**(A)** Design overview of DdCBEs for *Cox1* G5699, *Cox2* G7316, and *Cox3* G8768 sites. **(B)** The location of DdCBE-introduced stop codon at COX1, COX2, and COX3. **(C to E)** Sanger



sequencing for *Cox1* G5699 (C), *Cox2* G7316 (D), and *Cox3* G9438 (E) sites in PB-DdCBE plasmids transfected C6 cells. **(F to K)** The protein level of COX1 (F and G), COX2 (H and I), and COX3 (J and K) in C6 cells treated with FNZ or targeted by corresponding DdCBEs were analyzed by western blot and quantification. n = 3 technical replicates. Data were presented as means  $\pm$  SD. ns, not significant, \* $P \leq 0.05$ , \*\* $P \leq 0.01$ , \*\*\* $P \leq 0.001$ , \*\*\*\* $P \leq 0.0001$  by one-way ANOVA test paired with a Tukey's Honest Significant Difference.

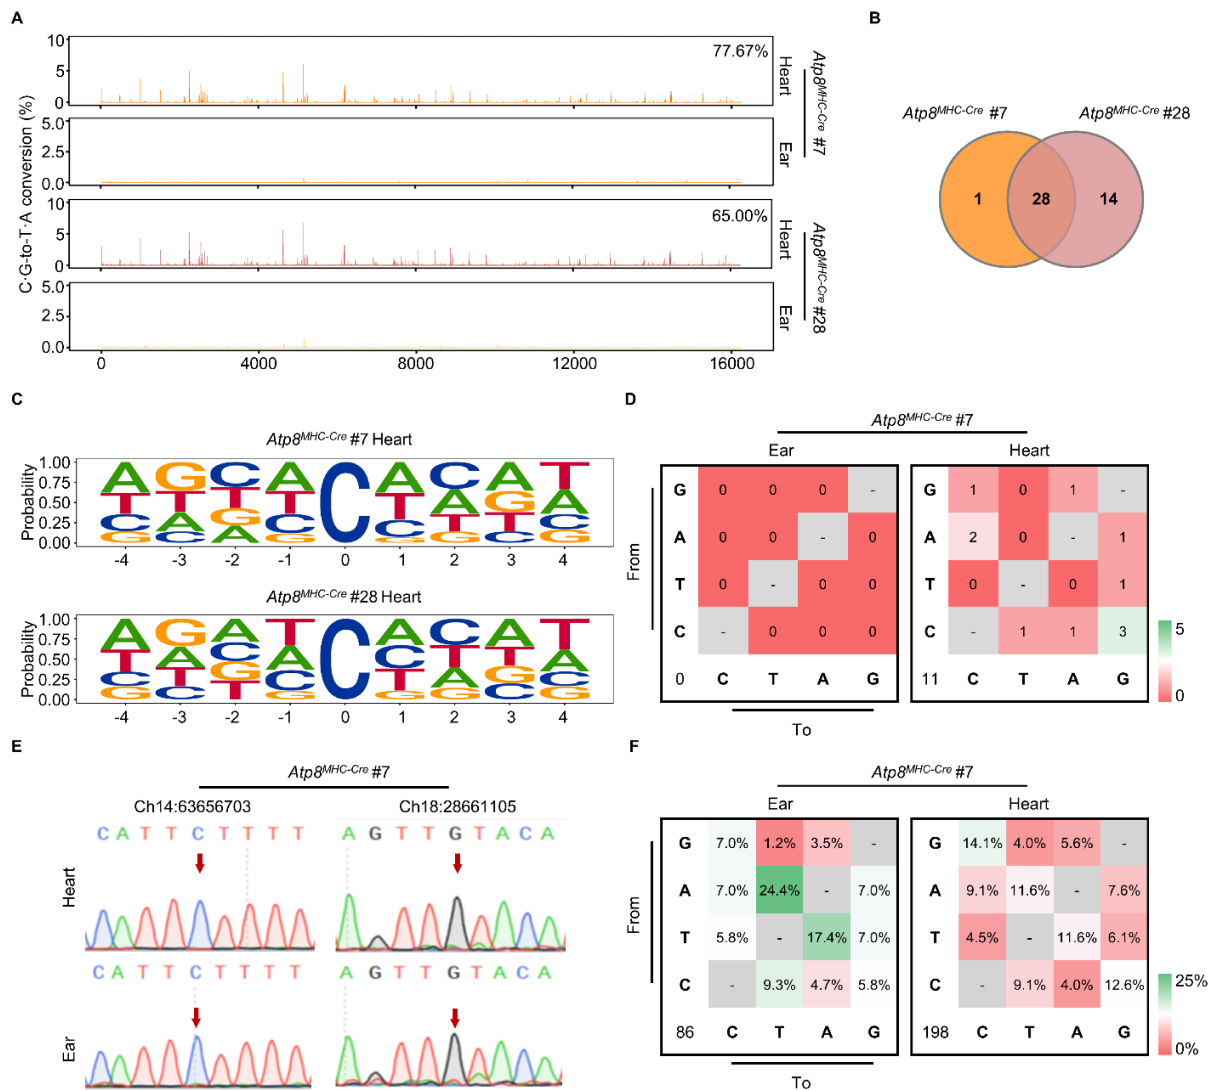

**Fig. S12.**

**Off-target analysis on whole mitochondrial genome and nuclear genome.**

(A) The frequencies of C-G-to-T-A conversion at off-target sites in the whole mitochondrial genome of *Atp8<sup>MHC-Cre</sup>* rats. The editing frequency of on-target was detected by Deep sequencing and marked in the upper right corner. (B) Venn diagram showing the overlap of off-target sites between *Atp8<sup>MHC-Cre</sup> #7* rat and *ATP8<sup>MHC-Cre</sup> #28* rat. (C) The motif analysis for non-target sites in heart tissue of *Atp8<sup>MHC-Cre</sup> #7* and *ATP8<sup>MHC-Cre</sup> #28* rats. (D) The distribution of base conversion type in the nuclear genome of *Atp8<sup>MHC-Cre</sup> #7* rat. The numbers in each cell indicated the number of a certain mutation type. The number of detected SNVs was marked in the bottom left cell. (E) Sanger sequencing for putative off-target sites in *Atp8<sup>MHC-Cre</sup> #7*. (F) The distribution of base conversion type in the nuclear genome of *Atp8<sup>MHC-Cre</sup> #7* rat. The numbers in cell indicated the proportion of a certain mutation type.

**Table S1.****Injection summary of CRISPR/Cas9-mediated LSL-DdCBE knockin (KI) rats.**

| <b>Target gene</b> | <b>gRNA Con. (ng/<math>\mu</math>L)</b> | <b>Donor Con. (ng/<math>\mu</math>L)</b> | <b>Cas9 (ng/<math>\mu</math>L)</b> | <b>No. of injected zygotes</b> | <b>No. of transplanted zygotes</b> | <b>No. of pups</b> | <b>No. of KI pups</b> |
|--------------------|-----------------------------------------|------------------------------------------|------------------------------------|--------------------------------|------------------------------------|--------------------|-----------------------|
| <i>Atp8</i>        | 12 + 12                                 | 7                                        | 30                                 | 75                             | 44                                 | 10                 | 5                     |
| <i>Nd1</i>         | 12 + 12                                 | 4                                        | 30                                 | 77                             | 44                                 | 16                 | 14                    |
| <i>Cytb</i>        | 12 + 12                                 | 8                                        | 30                                 | 79                             | 43                                 | 8                  | 8                     |
| <i>Cox3</i>        | 12 + 12                                 | 7                                        | 30                                 | 70                             | 46                                 | 20                 | 7                     |
| <i>Nd2</i>         | 12 + 12                                 | 4                                        | 30                                 | 60                             | 41                                 | 10                 | 6                     |
| <i>Nd5</i>         | 12 + 12                                 | 4                                        | 30                                 | 143                            | 90                                 | 8                  | 5                     |

**Table S2.****Primers used in this study.**

|                                              | <b>Primers</b>          | <b>Sequence (5'-3')</b>                                       |
|----------------------------------------------|-------------------------|---------------------------------------------------------------|
| Primers for RVD                              | RVD seq Fwd             | TGACCGCAGTGGAGGCAGTG                                          |
|                                              | RVD seq Rev             | GCATCCAGCGCAGGAC                                              |
| Primers for genotyping                       | Rat-Up-Fwd              | GGGTGGCGAAGGTAATGTCT                                          |
|                                              | Rat-Up-Rev              | GCTATGAACTAATGACCCCCGTAATT                                    |
|                                              | Rat-Down-Fwd            | GCATCTGACTTCTGGCTAATAAAG                                      |
|                                              | Rat-Down-Rev            | CATTAACAGGAAATGGCTCAGTTTATAAATG                               |
|                                              | Rat-G2966-Fwd           | GAAAATCCTAGGCTACATACAACTACG                                   |
|                                              | Rat-G2966-Rev           | GAGGATAATGGCTATTGTGACTT                                       |
|                                              | Rat-G7783- Fwd          | TGCTCTGAAATTTGCGGCTC                                          |
|                                              | Rat-G7783-Rev           | AGTCGGTTGCTGATTAGGCG                                          |
|                                              | Rat-loxP-Fwd            | TCTGCTAACCATGTTTCATGCC                                        |
| Rat-loxP-Rev                                 | GCTACCTTTATCGTCGTCATCCT |                                                               |
| Primers for DddA <sub>tox</sub> halves       | Halves Fwd              | TTGCGGAGACTCACCCCTT                                           |
|                                              | Halves Rev              | TGTAAACCCATGGCCGAC                                            |
| Primers for on-target sanger-sequence        | rND1KO-seq-Fwd          | ATGGCCTTCCTCACCCTAGT                                          |
|                                              | rND1KO-seq-Rev          | AATAGGGCGAATGGTCCTGC                                          |
|                                              | rND2KO-seq-Fwd          | GGCCCATACCCCGAAAATGT                                          |
|                                              | rND2KO-seq-Rev          | TCCTTGGGTGACTTCGGGTA                                          |
|                                              | rCOX1KO-seq-Fwd         | AGGCGGGAGAAGCCTTAGTA                                          |
|                                              | rCOX1KO-seq-Rev         | AGATAGAAGACACCCCGGCT                                          |
|                                              | rCOX2KO-seq-Fwd         | AGCCTTCGCATCAAAACGAG                                          |
|                                              | rCOX2KO-seq-Rev         | TAGGTGATGTGGCGTCTTGT                                          |
|                                              | rATP8KO-seq-Fwd         | CCCGCCCCATCTAACATCTC                                          |
|                                              | rATP8KO-seq-Rev         | AGAAGCGTGTTAGGGTTGCT                                          |
|                                              | rATP6KO-seq-Fwd         | TCCCAAACCTTTCTGCACC                                           |
|                                              | rATP6KO-seq-Rev         | TCCTTGCGGTAAGAAGTGGG                                          |
|                                              | rCOX3KO-seq-Fwd         | TTCTTACCGCAAGGAACCCC                                          |
|                                              | rCOX3KO-seq-Rev         | TGGTGGCCTTGGTATGTTCC                                          |
|                                              | rND3KO-seq-Fwd          | CGCAGCATGATACTGACACT                                          |
|                                              | rND3KO-seq-Rev          | GTGCAGAACTTGTGGGTGCG                                          |
|                                              | rND4KO-seq-Fwd          | TGCGAAGCAGCAGTAGGTTTA                                         |
|                                              | rND4KO-seq-Rev          | AAGCGTTCTGTTTGGTTGCC                                          |
|                                              | rND5KO-seq-Fwd          | ACCTTGGTGCAACTCCAAAT                                          |
|                                              | rND5KO-seq-Rev          | CGGTTAATGTGGGGATCAGAGT                                        |
|                                              | rND6KO-seq-Fwd          | GCATCCTAGCAGGCTTCCTT                                          |
|                                              | rND6KO-seq-Rev          | GGTTGTCTAGGGTTGGCGTT                                          |
|                                              | rCYTBKO-seq-Fwd         | CCCGCCCCATCTAACATCTC                                          |
|                                              | rCYTBKO-seq-Rev         | AGAAGCGTGTTAGGGTTGCT                                          |
|                                              | rCOX1KO-2-seq-Fwd       | AGGCGGGAGAAGCCTTAGTA                                          |
|                                              | rCOX1KO-2-seq-Rev       | AGATAGAAGACACCCCGGCT                                          |
| rCOX2KO-2-seq-Fwd                            | CTTGGCTTACAAGACGCCAC    |                                                               |
| rCOX2KO-2-seq-Rev                            | CCTAGTGAAGGGACGGCTCA    |                                                               |
| rCOX3KO-2-seq-Fwd                            | TTCTTACCGCAAGGAACCCC    |                                                               |
| rCOX3KO-2-seq-Rev                            | TGGTGGCCTTGGTATGTTCC    |                                                               |
| Barcoded Primers for on-target Deep-sequence | i5-rND1KO-Fwd           | ACACTCTTTCCCTACACGACGCTCTTCCGATC<br>TTGCGAACCCATACGCCCCCTAAC  |
|                                              | i7-rND1KO-Rev           | GTGACTGGAGTTCAGACGTGTGCTCTTCCGA<br>TCTACCGCTCGTAGGGCTCCGAATAG |
|                                              | i5-rND2KO-Fwd           | ACACTCTTTCCCTACACGACGCTCTTCCGATC<br>TTGCTGTTGGTCTAAACCCTTCCCG |
|                                              | i7-rND2KO-Rev           | GTGACTGGAGTTCAGACGTGTGCTCTTCCGA<br>TCTACCTTGAGGCTGTAGCTTGGGTT |

|                  |                                                                  |
|------------------|------------------------------------------------------------------|
| i5-rCOX1KO-Fwd   | ACACTCTTCCCTACACGACGCTCTTCCGATC<br>TTGCTGCTCGTAAACCGTTGACTCT     |
| i7-rCOX1KO-Rev   | GTGACTGGAGTTCAGACGTGTGCTCTTCCGA<br>TCTACCTACGAATGCATGGGCTGTGA    |
| i5-rCOX2KO-Fwd   | ACACTCTTCCCTACACGACGCTCTTCCGATC<br>TTGCGGAAGGATTCGAACCCCTACA     |
| i7-rCOX2KO-Rev   | GTGACTGGAGTTCAGACGTGTGCTCTTCCGA<br>TCTACCTGGGCGTCTATTGTGCTTGT    |
| i5-rATP8KO-Fwd   | ACACTCTTCCCTACACGACGCTCTTCCGATC<br>TTGCAACTCATTGCGAAGCTTAGAGCG   |
| i7-rATP8KO-Rev   | GTGACTGGAGTTCAGACGTGTGCTCTTCCGA<br>TCTACCTGTGGGGTAATGAAAGAGGC    |
| i5-rATP6KO-Fwd   | ACACTCTTCCCTACACGACGCTCTTCCGATC<br>TTGCAACGCCTAATCAGCAACCGA      |
| i7-rATP6KO-Rev   | GTGACTGGAGTTCAGACGTGTGCTCTTCCGA<br>TCTACCTGCTCATAGGGGGATGGCTA    |
| i5-rCOX3KO-Fwd   | ACACTCTTCCCTACACGACGCTCTTCCGATC<br>TTGCACTTGAATTTGCCGTAGCCT      |
| i7-rCOX3KO-Rev   | GTGACTGGAGTTCAGACGTGTGCTCTTCCGA<br>TCTACCAGGATGTTTGTGTCAGGAGGCC  |
| i5-rND3KO-Fwd    | ACACTCTTCCCTACACGACGCTCTTCCGATC<br>TTGCGATGAGGATCCTACTCCCTTAGT   |
| i7-rND3KO-Rev    | GTGACTGGAGTTCAGACGTGTGCTCTTCCGA<br>TCTACCGTGCAGAACTTGTGGGTCG     |
| i5-rND4KO-Fwd    | ACACTCTTCCCTACACGACGCTCTTCCGATC<br>TTGCCTGCGAAGCAGCAGTAGGTT      |
| i7-rND4KO-Rev    | GTGACTGGAGTTCAGACGTGTGCTCTTCCGA<br>TCTACCTGGGGTGGATAATGGATCGG    |
| i5-rND5KO-Fwd    | ACACTCTTCCCTACACGACGCTCTTCCGATC<br>TTGCTCCTCCTTAGCCTTTACCTT      |
| i7-rND5KO-Rev    | GTGACTGGAGTTCAGACGTGTGCTCTTCCGA<br>TCTACCCGGTTAATGTGGGGATCAGAG   |
| i5-rND6KO-Fwd    | ACACTCTTCCCTACACGACGCTCTTCCGATC<br>TTGCCAACTATAAATAGCCGCAACCCC   |
| i7-rND6KO-Rev    | GTGACTGGAGTTCAGACGTGTGCTCTTCCGA<br>TCTACCTATTTGGGGGGGATGTTGGTTG  |
| i5-rCYTBKO-Fwd   | ACACTCTTCCCTACACGACGCTCTTCCGATC<br>TTGCTCCTCACAGGCTTATTCCTAGC    |
| i7-rCYTBKO-Rev   | GTGACTGGAGTTCAGACGTGTGCTCTTCCGA<br>TCTACCTAGTCCTCGTCCCACATGGA    |
| i5-rCOX1KO-2-Fwd | ACACTCTTCCCTACACGACGCTCTTCCGATC<br>TTGCAGGCTTCGGGAACTGACTTG      |
| i7-rCOX1KO-2-Rev | GTGACTGGAGTTCAGACGTGTGCTCTTCCGA<br>TCTACCAGATAGAAGACACCCCGGCT    |
| i5-rCOX2KO-2-Fwd | ACACTCTTCCCTACACGACGCTCTTCCGATC<br>TTGCCACAAGCACAATAGACGCCC      |
| i7-rCOX2KO-2-Rev | GTGACTGGAGTTCAGACGTGTGCTCTTCCGA<br>TCTACCACGAAGTTCACCTGGTTTTAGGT |
| i5-rCOX3KO-2-Fwd | ACACTCTTCCCTACACGACGCTCTTCCGATC<br>TTGCACCCAAGCCCATGACCACTA      |
| i7-rCOX3KO-2-Rev | GTGACTGGAGTTCAGACGTGTGCTCTTCCGA<br>TCTACCATTCCGTATCGGAGGCCTTT    |

---

|                            |               |                      |
|----------------------------|---------------|----------------------|
| Primers for long-range PCR | rat-mt F1 Fwd | CCACCGCGGTCATACGATTA |
|                            | rat-mt F1 Rev | GGGGTAATTCCTGTTGGGGG |
|                            | rat-mt F2 Fwd | AAGGCCACCACCCCCTATT  |
|                            | rat-mt F2 Rev | CCGCCAAGTCCTTTGAGTTT |

---

**Table S3.****The detailed information of the six cKO rat strains in Rat Resource Database.**

| Accession No. | Strain Name                                     | Gene                     | Type                            | Description                                                                                                                                              | Links                                                                                                         |
|---------------|-------------------------------------------------|--------------------------|---------------------------------|----------------------------------------------------------------------------------------------------------------------------------------------------------|---------------------------------------------------------------------------------------------------------------|
| GC00215       | SD. Rosa26(tm-CAG-LSL-MT-ND1(G2996A))-GC/ILAS   | MT- <i>Nd1</i> (G2996)   | Knock in and condition knockout | Knockout mitochondrial protein-coding gene <i>Nd1</i> by using a DdCBE-induced premature stop codon at G2996 locus in the presence of Cre recombinase.   | <a href="https://www.ratresource.com/detail/12/1670.html">https://www.ratresource.com/detail/12/1670.html</a> |
| GC00216       | SD. Rosa26(tm-CAG-LSL-MT-ND2(G3992A))-GC/ILAS   | MT- <i>Nd2</i> (G3992)   | Knock in and condition knockout | Knockout mitochondrial protein-coding gene <i>Nd2</i> by using a DdCBE-induced premature stop codon at G3992 locus in the presence of Cre recombinase.   | <a href="https://www.ratresource.com/detail/12/1671.html">https://www.ratresource.com/detail/12/1671.html</a> |
| GC00217       | SD. Rosa26(tm-CAG-LSL-MT-ND5(G11938A))-GC/ILAS  | MT- <i>Nd5</i> (G11938)  | Knock in and condition knockout | Knockout mitochondrial protein-coding gene <i>Nd5</i> by using a DdCBE-induced premature stop codon at G11938 locus in the presence of Cre recombinase.  | <a href="https://www.ratresource.com/detail/12/1672.html">https://www.ratresource.com/detail/12/1672.html</a> |
| GC00218       | SD. Rosa26(tm-CAG-LSL-MT-CYTB(G14365A))-GC/ILAS | MT- <i>Cytb</i> (G14365) | Knock in and condition knockout | Knockout mitochondrial protein-coding gene <i>Cytb</i> by using a DdCBE-induced premature stop codon at G14365 locus in the presence of Cre recombinase. | <a href="https://www.ratresource.com/detail/12/1673.html">https://www.ratresource.com/detail/12/1673.html</a> |
| GC00219       | SD. Rosa26(tm-CAG-LSL-MT-COX3(G8645A))-GC/ILAS  | MT- <i>Cox3</i> (G8645)  | Knock in and condition knockout | Knockout mitochondrial protein-coding gene <i>Cox3</i> by using a DdCBE-induced premature stop codon at G8645 locus in the presence of Cre recombinase.  | <a href="https://www.ratresource.com/detail/12/1674.html">https://www.ratresource.com/detail/12/1674.html</a> |

|         |                                                |                         |                                 |                                                                                                                                                         |                                                                                                               |
|---------|------------------------------------------------|-------------------------|---------------------------------|---------------------------------------------------------------------------------------------------------------------------------------------------------|---------------------------------------------------------------------------------------------------------------|
| GC00220 | SD. Rosa26(tm-CAG-LSL-MT-ATP8(G7783A))-GC/ILAS | MT- <i>Atp8</i> (G7783) | Knock in and condition knockout | Knockout mitochondrial protein-coding gene <i>Atp8</i> by using a DdCBE-induced premature stop codon at G7783 locus in the presence of Cre recombinase. | <a href="https://www.ratresource.com/detail/12/1675.html">https://www.ratresource.com/detail/12/1675.html</a> |
|---------|------------------------------------------------|-------------------------|---------------------------------|---------------------------------------------------------------------------------------------------------------------------------------------------------|---------------------------------------------------------------------------------------------------------------|

## Sequence S1.

### Amino acid sequences for DdCBEs.

Amino acid sequences of DdCBE-Nd1 for *Nd1* G2996 site targeting were annotated as: red for MTS, italics for linker, yellow for flag tag, green for N&C-terminal domain, underlined for RVDs, purple for split DddA<sub>tox</sub> halves, and cyan for UGI. Other targeting DdCBE only showed RVDs sequences.

#### ND1-W<sub>86</sub>-L14 TALE-G1333C

MLGFVGRVAAAPASGALRRLTPSASLPPAQLLLRAAPTAVHPVRDYAAQTSSESGGGGSP  
G<sup>444</sup>DYKDDDDKGSV<sup>DLR</sup>TLGYSQQQ<sup>QEKIKPKVRSTVAQHHEALVGHGFTHAHIVAL</sup>  
SQHPAALGTVAVKYQDMIAALPEATHEAIVGVGKQWSGARALEALLTVAGELRGPPLQ  
LDTGOLLKIAKRGGVTAVEAVHAWRNALTGAPLNLTPEQVVAIASN<sup>GGGKQALETVQR</sup>  
LLPVLCQAHGLTPEQVVAIASN<sup>IGGKQALETVQRLLPVLCQAHGLTPDQVVAIASHDGG</sup>  
KQALETVQRLLPVLCQAHGLTPAQVVAIASN<sup>IGGKQALETVQRLLPVLCQAHGLTPDQV</sup>  
VAIASH<sup>DGGKQALETVQRLLPVLCQAHGLTPAQVVAIASN</sup>GGGKQALETVQRLLPVLC  
QAHGLTPEQVVAIASN<sup>IGGKQALETVQRLLPVLCQAHGLTPDQVVAIASN</sup>GGGKQALET  
VQRLLPVLCQAHGLTPEQVVAIASH<sup>DGGKQALETVQRLLPVLCQAHGLTPAQVVAIAS</sup>  
N<sup>GGGKQALETVQRLLPVLCQAHGLTPEQVVAIASH</sup>DGGKQALETVQRLLPVLCQAHGL  
TPAQVVAIASN<sup>GGGKQALETVQRLLPVLCQAHGLTPEQVVAIASN</sup>IGGKQALETVQRLL  
PVLCQAHGLTPDQVVAIASN<sup>IGGRP</sup>ALES<sup>IVAQLSRPDPALAAL</sup>TNDHLVALACL<sup>GGRP</sup>  
ALDAVKKGLGGS<sup>PTYPNYANAGHVEGQSALFMRDNGISEGLVFHNNPEGTCGFCVNM</sup>  
TETLLPENAKMTVVPPEGAIPVKRGATGETKVFTGNSNSPKSPTKGGC<sup>SGGSTNLS</sup>DIIEK  
ETGKQLVIQESILMLPEEVEEVIGNKPESDILVHTAYDESTDENVMMLTSDAPEYKPPWAL  
VIQDSNGENKIKML

#### ND1-W<sub>86</sub>-L14 TALE-G1397C

MLGFVGRVAAAPASGALRRLTPSASLPPAQLLLRAAPTAVHPVRDYAAQTSSESGGGGSP  
G<sup>444</sup>DYKDDDDKGSV<sup>DLR</sup>TLGYSQQQ<sup>QEKIKPKVRSTVAQHHEALVGHGFTHAHIVAL</sup>  
SQHPAALGTVAVKYQDMIAALPEATHEAIVGVGKQWSGARALEALLTVAGELRGPPLQ  
LDTGOLLKIAKRGGVTAVEAVHAWRNALTGAPLNLTPEQVVAIASN<sup>GGGKQALETVQR</sup>  
LLPVLCQAHGLTPEQVVAIASN<sup>IGGKQALETVQRLLPVLCQAHGLTPDQVVAIASHDGG</sup>  
KQALETVQRLLPVLCQAHGLTPAQVVAIASN<sup>IGGKQALETVQRLLPVLCQAHGLTPDQV</sup>  
VAIASH<sup>DGGKQALETVQRLLPVLCQAHGLTPAQVVAIASN</sup>GGGKQALETVQRLLPVLC  
QAHGLTPEQVVAIASN<sup>IGGKQALETVQRLLPVLCQAHGLTPDQVVAIASN</sup>GGGKQALET  
VQRLLPVLCQAHGLTPEQVVAIASH<sup>DGGKQALETVQRLLPVLCQAHGLTPAQVVAIAS</sup>  
N<sup>GGGKQALETVQRLLPVLCQAHGLTPEQVVAIASH</sup>DGGKQALETVQRLLPVLCQAHGL  
TPAQVVAIASN<sup>GGGKQALETVQRLLPVLCQAHGLTPEQVVAIASN</sup>IGGKQALETVQRLL  
PVLCQAHGLTPDQVVAIASN<sup>IGGRP</sup>ALES<sup>IVAQLSRPDPALAAL</sup>TNDHLVALACL<sup>GGRP</sup>  
ALDAVKKGLGGS<sup>IPVKRGATGETKVFTGNSNSPKSPTKGGC</sup>SGGSTNLS<sup>DIIEKETGKQ</sup>  
LVIQESILMLPEEVEEVIGNKPESDILVHTAYDESTDENVMMLTSDAPEYKPPWALVIQDS  
NGENKIKML

#### ND1-W<sub>86</sub>-L14 TALE-G1333N

MLGFVGRVAAAPASGALRRLTPSASLPPAQLLLRAAPTAVHPVRDYAAQTSSESGGGGSP  
G<sup>444</sup>DYKDDDDKGSV<sup>DLR</sup>TLGYSQQQ<sup>QEKIKPKVRSTVAQHHEALVGHGFTHAHIVAL</sup>  
SQHPAALGTVAVKYQDMIAALPEATHEAIVGVGKQWSGARALEALLTVAGELRGPPLQ  
LDTGOLLKIAKRGGVTAVEAVHAWRNALTGAPLNLTPEQVVAIASN<sup>GGGKQALETVQR</sup>  
LLPVLCQAHGLTPEQVVAIASN<sup>IGGKQALETVQRLLPVLCQAHGLTPDQVVAIASHDGG</sup>  
KQALETVQRLLPVLCQAHGLTPAQVVAIASN<sup>IGGKQALETVQRLLPVLCQAHGLTPDQV</sup>



VAIASHDGGKQALETVQRLLPVLCQAHGLTPAQVVAIASNNGGGKQALETVQRLLPVLC  
QAHGLTPEQVVAIASNIGGKQALETVQRLLPVLCQAHGLTPDQVVAIASNNGGGKQALET  
VQRLLPVLCQAHGLTPEQVVAIASHDGGKQALETVQRLLPVLCQAHGLTPAQVVAIAS  
NNGGGKQALETVQRLLPVLCQAHGLTPEQVVAIASHDGGKQALETVQRLLPVLCQAHGL  
TPAQVVAIASNNGGGKQALETVQRLLPVLCQAHGLTPEQVVAIASNIGGKQALETVQRL  
PVLCQAHGLTPDQVVAIASNIGGRPAALE SIVAQLSRPDPALAAALNDHLVALACLGGRP  
ALDAVKKGLG GSGSYALGPYQISAPQLPAYNGQTVGTFYVNDAGGLESKVFSSGGSG  
GSTNLSDIIEKETGKQLVIQESILMLPEEVEEVIGNKPESDILVHTAYDESTDENVMMLTSD  
APEYKPWALVIQDSNGENKIKML

ND1-W<sub>86</sub>-L14 TALE-G1397N

MLGFVGRVAAAPASGALRRLTPSASLPPAQLLLRAAPTAVHPVRDYAAQTSSESGGGGSP  
GAAA DYKDDDDK GSVDLRTLGYSSQQQEKIKPKVRSTVAQHHEALVGHGFTHAHIVAL  
SQHPAALGTVAVKYQDMIAALPEATHEAIVGVGKQWSGARALEALLTVAGELRGPPLQ  
LDTGQLLKIARKGGVTAVEAVHAWRNALTGAPLNLTPAQVVAIASNNGGGKQALETVQR  
LLPVLCQAHGLTPEQVVAIASNIGGKQALETVQRLLPVLCQAHGLTPDQVVAIASHDGG  
KQALETVQRLLPVLCQAHGLTPAQVVAIASNIGGKQALETVQRLLPVLCQAHGLTPDQV  
VAIASHDGGKQALETVQRLLPVLCQAHGLTPAQVVAIASNNGGGKQALETVQRLLPVLC  
QAHGLTPEQVVAIASNIGGKQALETVQRLLPVLCQAHGLTPDQVVAIASNNGGGKQALET  
VQRLLPVLCQAHGLTPEQVVAIASHDGGKQALETVQRLLPVLCQAHGLTPAQVVAIAS  
NNGGGKQALETVQRLLPVLCQAHGLTPEQVVAIASHDGGKQALETVQRLLPVLCQAHGL  
TPAQVVAIASNNGGGKQALETVQRLLPVLCQAHGLTPEQVVAIASNIGGKQALETVQRL  
PVLCQAHGLTPDQVVAIASNIGGRPAALE SIVAQLSRPDPALAAALNDHLVALACLGGRP  
ALDAVKKGLG GSGSYALGPYQISAPQLPAYNGQTVGTFYVNDAGGLESKVFSSGGPT  
PYPNYANAGHVEGQSALFMRDNGISEGLVFHNNPEGTCGFCVNM TETLLPENAKMTV  
PPEGSGGSTNLSDIIEKETGKQLVIQESILMLPEEVEEVIGNKPESDILVHTAYDESTDEN  
VMLLTS DAPEYKPWALVIQDSNGENKIKML

ND1-W<sub>86</sub>-R17 TALE-G1333C

MLGFVGRVAAAPASGALRRLTPSASLPPAQLLLRAAPTAVHPVRDYAAQTSSESGGGGSP  
GAAA DYKDDDDK GSVDLRTLGYSSQQQEKIKPKVRSTVAQHHEALVGHGFTHAHIVAL  
SQHPAALGTVAVKYQDMIAALPEATHEAIVGVGKQWSGARALEALLTVAGELRGPPLQ  
LDTGQLLKIARKGGVTAVEAVHAWRNALTGAPLNLTPAQVVAIASNIGGKQALETVQR  
LLPVLCQAHGLTPDQVVAIASNIGGKQALETVQRLLPVLCQAHGLTPDQVVAIASNNGG  
KQALETVQRLLPVLCQAHGLTPEQVVAIASNNGGKQALETVQRLLPVLCQAHGLTPEQ  
VVAIASNNGGKQALETVQRLLPVLCQAHGLTPEQVVAIASNNGGKQALETVQRLLPV  
CQAHGLTPEQVVAIASNNGGKQALETVQRLLPVLCQAHGLTPEQVVAIASNNGGKQAL  
ETVQRLLPVLCQAHGLTPEQVVAIASNNGGKQALETVQRLLPVLCQAHGLTPEQVVAIA  
SNIGGKQALETVQRLLPVLCQAHGLTPDQVVAIASNNGGKQALETVQRLLPVLCQAHG  
LTPEQVVAIASNNGGKQALETVQRLLPVLCQAHGLTPEQVVAIASNNGGKQALETVQR  
LLPVLCQAHGLTPEQVVAIASNIGGKQALETVQRLLPVLCQAHGLTPDQVVAIASNNGG  
KQALETVQRLLPVLCQAHGLTPEQVVAIASNNGGKQALETVQRLLPVLCQAHGLTPEQ  
VVAIASNNGGRPAALE SIVAQLSRPDPALAAALNDHLVALACLGGRPALDAVKKGLG GSP  
TPYPNYANAGHVEGQSALFMRDNGISEGLVFHNNPEGTCGFCVNM TETLLPENAKMTV  
VPPEGAIPVVRGATGETKVFTGNSNSPKSPTKGGC SGGSTNLSDIIEKETGKQLVIQESIL  
MLPEEVEEVIGNKPESDILVHTAYDESTDENVMMLTSDAPEYKPWALVIQDSNGENKIK  
ML

ND1-W<sub>86</sub>-R17 TALE-G1397C

MLGFVGRVAAAPASGALRRLTPSASLPPAQLLLRAAPTAVHPVRDYAAQTSESAGGGGSP  
GAAA DYKDDDDK GS VDLRTLGYSSQQQEKIKPKVRSTVAQHHEALVGHGFTHAHIVAL  
SQHPAALGTAVKYQDMIAALPEATHEAIVGVGKQWSGARALEALLTVAGELRGPPLQ  
LDTGQLLKIAKRGGVTAVEAVHAWRNALTGAPLNLTPEQVVAIASNIGGKQALETVQR  
LLPVLCQAHGLTPDQVVAIASNIGGKQALETVQRLLPVLCQAHGLTPDQVVAIASNNGG  
KQALETVQRLLPVLCQAHGLTPEQVVAIASNNGGKQALETVQRLLPVLCQAHGLTPEQ  
VVAIASNNGGKQALETVQRLLPVLCQAHGLTPEQVVAIASNNGGKQALETVQRLLPV  
CQAHGLTPEQVVAIASNNGGKQALETVQRLLPVLCQAHGLTPEQVVAIASNNGGKQAL  
ETVQRLLPVLCQAHGLTPEQVVAIASNNGGKQALETVQRLLPVLCQAHGLTPEQVVAIA  
SNIGGKQALETVQRLLPVLCQAHGLTPDQVVAIASNNGGKQALETVQRLLPVLCQAHG  
LTPEQVVAIASNNGGKQALETVQRLLPVLCQAHGLTPEQVVAIASNNGGKQALETVQR  
LLPVLCQAHGLTPEQVVAIASNIGGKQALETVQRLLPVLCQAHGLTPDQVVAIASNNGG  
KQALETVQRLLPVLCQAHGLTPEQVVAIASNNGGKQALETVQRLLPVLCQAHGLTPEQ  
VVAIASNNGGRPALESIVAQLSRPDPALAAALNDHLVALACLGGRPALDAVKKGLG GSA  
IPVKRGATGETKVFTGNSNSPKSPTKGGC SGGSTNLSDIIEKETGKQLVIQESILMLPEEVE  
EVIGNKPESDILVHTAYDESTDENVMMLTSDAPEYKPWALVIQDSNGENKIKML

ND1-W<sub>86</sub>-R17 TALE-G1333N

MLGFVGRVAAAPASGALRRLTPSASLPPAQLLLRAAPTAVHPVRDYAAQTSESAGGGGSP  
GAAA DYKDDDDK GS VDLRTLGYSSQQQEKIKPKVRSTVAQHHEALVGHGFTHAHIVAL  
SQHPAALGTAVKYQDMIAALPEATHEAIVGVGKQWSGARALEALLTVAGELRGPPLQ  
LDTGQLLKIAKRGGVTAVEAVHAWRNALTGAPLNLTPEQVVAIASNIGGKQALETVQR  
LLPVLCQAHGLTPDQVVAIASNIGGKQALETVQRLLPVLCQAHGLTPDQVVAIASNNGG  
KQALETVQRLLPVLCQAHGLTPEQVVAIASNNGGKQALETVQRLLPVLCQAHGLTPEQ  
VVAIASNNGGKQALETVQRLLPVLCQAHGLTPEQVVAIASNNGGKQALETVQRLLPV  
CQAHGLTPEQVVAIASNNGGKQALETVQRLLPVLCQAHGLTPEQVVAIASNNGGKQAL  
ETVQRLLPVLCQAHGLTPEQVVAIASNNGGKQALETVQRLLPVLCQAHGLTPEQVVAIA  
SNIGGKQALETVQRLLPVLCQAHGLTPDQVVAIASNNGGKQALETVQRLLPVLCQAHG  
LTPEQVVAIASNNGGKQALETVQRLLPVLCQAHGLTPEQVVAIASNNGGKQALETVQR  
LLPVLCQAHGLTPEQVVAIASNIGGKQALETVQRLLPVLCQAHGLTPDQVVAIASNNGG  
KQALETVQRLLPVLCQAHGLTPEQVVAIASNNGGKQALETVQRLLPVLCQAHGLTPEQ  
VVAIASNNGGRPALESIVAQLSRPDPALAAALNDHLVALACLGGRPALDAVKKGLG GSG  
SYALGPYQISAPQLPAYNGQTVGTFYYVNDAGGLESKVFSSGG SGGSTNLSDIIEKETGK  
QLVIQESILMLPEEVEEVIGNKPESDILVHTAYDESTDENVMMLTSDAPEYKPWALVIQD  
SNGENKIKML

ND1-W<sub>86</sub>-R17 TALE-G1397N

MLGFVGRVAAAPASGALRRLTPSASLPPAQLLLRAAPTAVHPVRDYAAQTSESAGGGGSP  
GAAA DYKDDDDK GS VDLRTLGYSSQQQEKIKPKVRSTVAQHHEALVGHGFTHAHIVAL  
SQHPAALGTAVKYQDMIAALPEATHEAIVGVGKQWSGARALEALLTVAGELRGPPLQ  
LDTGQLLKIAKRGGVTAVEAVHAWRNALTGAPLNLTPEQVVAIASNIGGKQALETVQR  
LLPVLCQAHGLTPDQVVAIASNIGGKQALETVQRLLPVLCQAHGLTPDQVVAIASNNGG  
KQALETVQRLLPVLCQAHGLTPEQVVAIASNNGGKQALETVQRLLPVLCQAHGLTPEQ  
VVAIASNNGGKQALETVQRLLPVLCQAHGLTPEQVVAIASNNGGKQALETVQRLLPV  
CQAHGLTPEQVVAIASNNGGKQALETVQRLLPVLCQAHGLTPEQVVAIASNNGGKQAL  
ETVQRLLPVLCQAHGLTPEQVVAIASNNGGKQALETVQRLLPVLCQAHGLTPEQVVAIA  
SNIGGKQALETVQRLLPVLCQAHGLTPDQVVAIASNNGGKQALETVQRLLPVLCQAHG  
LTPEQVVAIASNNGGKQALETVQRLLPVLCQAHGLTPEQVVAIASNNGGKQALETVQR

LLPVLCQAHGLTPEQVVAIASNIGGKQALETVQRLLPVLCQAHGLTPDQVVAIASNGGG  
KQALETVQRLLPVLCQAHGLTPEQVVAIASNGGGKQALETVQRLLPVLCQAHGLTPEQ  
VVAIASNNGGRPAALESIVAQLSRPDPALAAALTNDHLVALACLGGRPALDAVKKGLGGS  
SYALGPYQISAPQLPAYNGQTVGTFYYVNDAGGLESKVFSSGGPTYPNYANAGHVEG  
QSALFMRDNGISEGLVFHNNPEGTGFCVNMTE~~LLPENAKMTVVPPEG~~SGGSTNLSDII  
EKETGKQLVIQESILMLPEEVEEVIGNKPESDILVHTAYDESTDENVMLLTSDAPEYKPW  
ALVIQDSNGENKIKML

**ATP8-W<sub>9</sub>-L17**

LTPEQVVAIASNNGGKQALETVQRLLPVLCQAHGLTPEQVVAIASHDGGKQALETVQR  
LLPVLCQAHGLTPAQVVAIASHDGGKQALETVQRLLPVLCQAHGLTPAQVVAIASNIGG  
KQALETVQRLLPVLCQAHGLTPDQVVAIASHDGGKQALETVQRLLPVLCQAHGLTPAQ  
VVAIASNIGGKQALETVQRLLPVLCQAHGLTPDQVVAIASNIGGKQALETVQRLLPVLC  
QAHGLTPDQVVAIASHDGGKQALETVQRLLPVLCQAHGLTPAQVVAIASNGGGKQALE  
TVQRLLPVLCQAHGLTPEQVVAIASNIGGKQALETVQRLLPVLCQAHGLTPDQVVAIAS  
NNGGKQALETVQRLLPVLCQAHGLTPEQVVAIASNIGGKQALETVQRLLPVLCQAHGL  
TPDQVVAIASHDGGKQALETVQRLLPVLCQAHGLTPAQVVAIASNIGGKQALETVQRLL  
PVLCQAHGLTPDQVVAIASHDGGKQALETVQRLLPVLCQAHGLTPAQVVAIASNIGGK  
QALETVQRLLPVLCQAHGLTPDQVVAIASNGGGRPAALESIVAQLSRPDPAL

**ATP8-W<sub>9</sub>-R15**

LTPEQVVAIASNIGGKQALETVQRLLPVLCQAHGLTPDQVVAIASNGGGKQALETVQRLL  
PVLCQAHGLTPEQVVAIASNGGGKQALETVQRLLPVLCQAHGLTPEQVVAIASNNGG  
KQALETVQRLLPVLCQAHGLTPEQVVAIASNIGGKQALETVQRLLPVLCQAHGLTPDQV  
VAIASNNGGKQALETVQRLLPVLCQAHGLTPEQVVAIASNNGGKQALETVQRLLPVLC  
QAHGLTPEQVVAIASNIGGKQALETVQRLLPVLCQAHGLTPDQVVAIASNNGGKQALET  
VQRLLPVLCQAHGLTPEQVVAIASNIGGKQALETVQRLLPVLCQAHGLTPDQVVAIASN  
GGGKQALETVQRLLPVLCQAHGLTPEQVVAIASNNGGKQALETVQRLLPVLCQAHGLT  
PEQVVAIASNIGGKQALETVQRLLPVLCQAHGLTPDQVVAIASNGGGKQALETVQRLLP  
VLCQAHGLTPEQVVAIASNGGGRPAALESIVAQLSRPDPAL

**ND2-W<sub>30</sub>-L16**

LTPEQVVAIASHDGGKQALETVQRLLPVLCQAHGLTPAQVVAIASNGGGKQALETVQR  
LLPVLCQAHGLTPEQVVAIASNIGGKQALETVQRLLPVLCQAHGLTPDQVVAIASNNGG  
KQALETVQRLLPVLCQAHGLTPEQVVAIASHDGGKQALETVQRLLPVLCQAHGLTPAQ  
VVAIASNGGGKQALETVQRLLPVLCQAHGLTPEQVVAIASHDGGKQALETVQRLLPVL  
CQAHGLTPAQVVAIASHDGGKQALETVQRLLPVLCQAHGLTPAQVVAIASNIGGKQAL  
ETVQRLLPVLCQAHGLTPDQVVAIASNIGGKQALETVQRLLPVLCQAHGLTPDQVVAIA  
SHDGGKQALETVQRLLPVLCQAHGLTPAQVVAIASNGGGKQALETVQRLLPVLCQAHG  
LTPEQVVAIASNGGGKQALETVQRLLPVLCQAHGLTPEQVVAIASNIGGKQALETVQRLL  
LPVLCQAHGLTPDQVVAIASHDGGKQALETVQRLLPVLCQAHGLTPAQVVAIASNGGG  
RPALESIVAQLSRPDPAL

**ND2-W<sub>30</sub>-R18**

LTPEQVVAIASNIGGKQALETVQRLLPVLCQAHGLTPDQVVAIASNIGGKQALETVQRLL  
PVLCQAHGLTPDQVVAIASNIGGKQALETVQRLLPVLCQAHGLTPDQVVAIASNIGGKQ  
ALETVQRLLPVLCQAHGLTPDQVVAIASNNGGKQALETVQRLLPVLCQAHGLTPEQVV  
AIASNNGGKQALETVQRLLPVLCQAHGLTPEQVVAIASHDGGKQALETVQRLLPVLCQ  
AHGLTPAQVVAIASNGGGKQALETVQRLLPVLCQAHGLTPEQVVAIASNGGGKQALET  
VQRLLPVLCQAHGLTPEQVVAIASNIGGKQALETVQRLLPVLCQAHGLTPDQVVAIASN



AIASNNGGKQALETVQRLLPVLCQAHGLTPEQVVAIASHDGGKQALETVQRLLPVLCQ  
AHGLTPAQVVAIASNGGGKQALETVQRLLPVLCQAHGLTPEQVVAIASNNGGKQALET  
VQRLLPVLCQAHGLTPEQVVAIASNGGGKQALETVQRLLPVLCQAHGLTPEQVVAIASN  
IGGKQALETVQRLLPVLCQAHGLTPDQVVAIASNNGGKQALETVQRLLPVLCQAHGLTP  
EQVVAIASNNGGKQALETVQRLLPVLCQAHGLTPEQVVAIASNIGGKQALETVQRLLPV  
LCQAHGLTPDQVVAIASNNGGKQALETVQRLLPVLCQAHGLTPEQVVAIASNNGGKQA  
LETVQRLLPVLCQAHGLTPEQVVAIASNGGGRPALESIVAQLSRPDPAL

**ND5-W<sub>68</sub>-L15**

LTPEQVVAIASNIGGKQALETVQRLLPVLCQAHGLTPDQVVAIASNNGGKQALETVQRLL  
PVLCQAHGLTPEQVVAIASNIGGKQALETVQRLLPVLCQAHGLTPDQVVAIASNIGGK  
QALETVQRLLPVLCQAHGLTPDQVVAIASNIGGKQALETVQRLLPVLCQAHGLTPDQVV  
AIASNNGGKQALETVQRLLPVLCQAHGLTPEQVVAIASHDGGKQALETVQRLLPVLCQ  
AHGLTPAQVVAIASNGGGKQALETVQRLLPVLCQAHGLTPEQVVAIASNNGGKQALET  
VQRLLPVLCQAHGLTPEQVVAIASNGGGKQALETVQRLLPVLCQAHGLTPEQVVAIASN  
IGGKQALETVQRLLPVLCQAHGLTPDQVVAIASNNGGKQALETVQRLLPVLCQAHGLTP  
EQVVAIASNNGGKQALETVQRLLPVLCQAHGLTPEQVVAIASNIGGKQALETVQRLLPV  
LCQAHGLTPDQVVAIASNNGGKQALETVQRLLPVLCQAHGLTPEQVVAIASNNGGKQA  
LETVQRLLPVLCQAHGLTPEQVVAIASNGGGRPALESIVAQLSRPDPAL

**ND5-W<sub>68</sub>-R15**

LTPEQVVAIASNIGGKQALETVQRLLPVLCQAHGLTPDQVVAIASNIGGKQALETVQRLL  
PVLCQAHGLTPDQVVAIASNNGGKQALETVQRLLPVLCQAHGLTPEQVVAIASNGGGK  
QALETVQRLLPVLCQAHGLTPEQVVAIASNGGGKQALETVQRLLPVLCQAHGLTPEQV  
VAIASNGGGKQALETVQRLLPVLCQAHGLTPEQVVAIASNIGGKQALETVQRLLPVLCQ  
AHGLTPDQVVAIASNIGGKQALETVQRLLPVLCQAHGLTPDQVVAIASNGGGKQALET  
VQRLLPVLCQAHGLTPEQVVAIASNIGGKQALETVQRLLPVLCQAHGLTPDQVVAIASN  
NGGKQALETVQRLLPVLCQAHGLTPEQVVAIASNIGGKQALETVQRLLPVLCQAHGLTP  
DQVVAIASNIGGKQALETVQRLLPVLCQAHGLTPDQVVAIASNGGGKQALETVQRLLPV  
LCQAHGLTPEQVVAIASNGGGRPALESIVAQLSRPDPAL

**ND6-W<sub>82</sub>-L15**

LTPEQVVAIASNIGGKQALETVQRLLPVLCQAHGLTPDQVVAIASNIGGKQALETVQRLL  
PVLCQAHGLTPDQVVAIASNIGGKQALETVQRLLPVLCQAHGLTPDQVVAIASNIGGKQ  
ALETVQRLLPVLCQAHGLTPDQVVAIASNIGGKQALETVQRLLPVLCQAHGLTPDQVVA  
IASNGGGKQALETVQRLLPVLCQAHGLTPEQVVAIASNIGGKQALETVQRLLPVLCQAH  
GLTPDQVVAIASNIGGKQALETVQRLLPVLCQAHGLTPDQVVAIASNIGGKQALETVQR  
LLPVLCQAHGLTPDQVVAIASHDGGKQALETVQRLLPVLCQAHGLTPAQVVAIASHDG  
GKQALETVQRLLPVLCQAHGLTPAQVVAIASNIGGKQALETVQRLLPVLCQAHGLTPDQ  
VVAIASNIGGKQALETVQRLLPVLCQAHGLTPDQVVAIASNGGGKQALETVQRLLPVLC  
QAHGLTPEQVVAIASNGGGRPALESIVAQLSRPDPAL

**ND6-W<sub>82</sub>-R15**

LTPEQVVAIASNIGGKQALETVQRLLPVLCQAHGLTPDQVVAIASHDGGKQALETVQRLL  
PVLCQAHGLTPAQVVAIASNGGGKQALETVQRLLPVLCQAHGLTPEQVVAIASNNGG  
KQALETVQRLLPVLCQAHGLTPEQVVAIASNIGGKQALETVQRLLPVLCQAHGLTPDQV  
VAIASNNGGKQALETVQRLLPVLCQAHGLTPEQVVAIASNNGGKQALETVQRLLPVLC  
QAHGLTPEQVVAIASNIGGKQALETVQRLLPVLCQAHGLTPDQVVAIASNNGGKQALET  
VQRLLPVLCQAHGLTPEQVVAIASNGGGKQALETVQRLLPVLCQAHGLTPEQVVAIASN  
IGGKQALETVQRLLPVLCQAHGLTPDQVVAIASHDGGKQALETVQRLLPVLCQAHGLTP

AQVVAIASHHDGGKQALETVQRLLPVLCQAHGLTPAQVVAIASHHDGGKQALETVQRLLPVLCQAHGLTPAQVVAIASNNGGRPPALESIVAQLSRPDPAL

**COX1-W<sub>25</sub>-L15**

LTPEQVVAIASHHDGGKQALETVQRLLPVLCQAHGLTPAQVVAIASNNGGGKQALETVQRLLPVLCQAHGLTPEQVVAIASNIGGGKQALETVQRLLPVLCQAHGLTPDQVVAIASHHDGGKQALETVQRLLPVLCQAHGLTPAQVVAIASNNGGGKQALETVQRLLPVLCQAHGLTPEQVVAIASNIGGGKQALETVQRLLPVLCQAHGLTPDQVVAIASNNGGGKQALETVQRLLPVLCQAHGLTPEQVVAIASNIGGGKQALETVQRLLPVLCQAHGLTPDQVVAIASNNGGGKQALETVQRLLPVLCQAHGLTPEQVVAIASNIGGGKQALETVQRLLPVLCQAHGLTPDQVVAIASNNGGGKQALETVQRLLPVLCQAHGLTPEQVVAIASNIGGGKQALETVQRLLPVLCQAHGLTPDQVVAIAS

**COX1-W<sub>25</sub>-R18**

LTPEQVVAIASHHDGGKQALETVQRLLPVLCQAHGLTPAQVVAIASNNGGGKQALETVQRLLPVLCQAHGLTPEQVVAIASNIGGGKQALETVQRLLPVLCQAHGLTPDQVVAIASHHDGGKQALETVQRLLPVLCQAHGLTPAQVVAIASNNGGGKQALETVQRLLPVLCQAHGLTPEQVVAIASNIGGGKQALETVQRLLPVLCQAHGLTPDQVVAIASNNGGGKQALETVQRLLPVLCQAHGLTPEQVVAIASNIGGGKQALETVQRLLPVLCQAHGLTPDQVVAIASNNGGGKQALETVQRLLPVLCQAHGLTPEQVVAIASNIGGGKQALETVQRLLPVLCQAHGLTPDQVVAIASNNGGGKQALETVQRLLPVLCQAHGLTPEQVVAIASNIGGGKQALETVQRLLPVLCQAHGLTPDQVVAIAS

**COX2-Q<sub>6</sub>-L18**

LTPEQVVAIASNIGGGKQALETVQRLLPVLCQAHGLTPDQVVAIASNNGGGKQALETVQRLLPVLCQAHGLTPEQVVAIASNIGGGKQALETVQRLLPVLCQAHGLTPDQVVAIASNNGGGKQALETVQRLLPVLCQAHGLTPEQVVAIASNIGGGKQALETVQRLLPVLCQAHGLTPDQVVAIASNNGGGKQALETVQRLLPVLCQAHGLTPEQVVAIASNIGGGKQALETVQRLLPVLCQAHGLTPDQVVAIASNIGGGKQALETVQRLLPVLCQAHGLTPEQVVAIASNIGGGKQALETVQRLLPVLCQAHGLTPDQVVAIASHDGGKQALETVQRLLPVLCQAHGLTPAQVVAIASNIGGGKQALETVQRLLPVLCQAHGLTPDQVVAIASNNGGGKQALETVQRLLPVLCQAHGLTPEQVVAIASNNGGGKQALETVQRLLPVLCQAHGLTPEQVVAIASNIGGGKQALETVQRLLPVLCQAHGLTPEQVVAIASHDGGKQALETVQRLLPVLCQAHGLTPAQVVAIASNNGGGKQALETVQRLLPVLCQAHGLTPEQVVAIASNNGGRPPALESIVAQLSRPDPAL

**COX2-Q<sub>6</sub>-R18**

LTPEQVVAIASNNGGGKQALETVQRLLPVLCQAHGLTPEQVVAIASNIGGGKQALETVQRLLPVLCQAHGLTPDQVVAIASNNGGGKQALETVQRLLPVLCQAHGLTPEQVVAIASNNGGGKQALETVQRLLPVLCQAHGLTPEQVVAIASNNGGGKQALETVQRLLPVLCQAHGLTPEQVVAIASNNGGGKQALETVQRLLPVLCQAHGLTPEQVVAIASNNGGGKQALETVQRLLPVLCQAHGLTPEQVVAIASNIGGGKQALETVQRLLPVLCQAHGLTPDQVVAIASNIGGGKQALETVQRLLPVLCQAHGLTPDQVVAIASNIGGGKQALETVQRLLPVLCQAHGLTPEQVVAIASNIGGGKQALETVQRLLPVLCQAHGLTPEQVVAIASNIGGGKQALETVQRLLPVLCQAHGLTPEQVVAIASNIGGGKQALETVQRLLPVLCQAHGLTPEQVVAIAS

**COX3-W<sub>16</sub>-L17**

LTPEQVVAIASNIGGKQALETVQRLLPVLCQAHGLTPDQVVAIASHDGGKQALETVQRL  
LPVLCQAHGLTPAQVVAIASHDGGKQALETVQRLLPVLCQAHGLTPAQVVAIASNIGGK  
QALETVQRLLPVLCQAHGLTPDQVVAIASNGGGKQALETVQRLLPVLCQAHGLTPEQV  
VAIASNIGGKQALETVQRLLPVLCQAHGLTPDQVVAIASNGGGKQALETVQRLLPVLCQ  
AHGLTPEQVVAIASNIGGKQALETVQRLLPVLCQAHGLTPDQVVAIASNGGGKQALETV  
QRLLPVLCQAHGLTPEQVVAIASNGGGKQALETVQRLLPVLCQAHGLTPEQVVAIASN  
GGKQALETVQRLLPVLCQAHGLTPDQVVAIASNIGGKQALETVQRLLPVLCQAHGLTPD  
QVVAIASNIGGKQALETVQRLLPVLCQAHGLTPDQVVAIASHDGGKQALETVQRLLPV  
LCQAHGLTPAQVVAIASHDGGKQALETVQRLLPVLCQAHGLTPAQVVAIASHDGGKQA  
LETVQRLLPVLCQAHGLTPAQVVAIASNIGGKQALETVQRLLPVLCQAHGLTPEQVVAIAS

**COX3-W<sub>16</sub>-R15**

LTPEQVVAIASNGGGKQALETVQRLLPVLCQAHGLTPEQVVAIASNIGGKQALETVQRL  
LPVLCQAHGLTPDQVVAIASNGGGKQALETVQRLLPVLCQAHGLTPEQVVAIASNIGGK  
QALETVQRLLPVLCQAHGLTPDQVVAIASNGGGKQALETVQRLLPVLCQAHGLTPEQV  
VAIASNGGGKQALETVQRLLPVLCQAHGLTPEQVVAIASNGGGKQALETVQRLLPVLC  
QAHGLTPEQVVAIASHDGGKQALETVQRLLPVLCQAHGLTPAQVVAIASNGGGKQALET  
TVQRLLPVLCQAHGLTPEQVVAIASHDGGKQALETVQRLLPVLCQAHGLTPAQVVAIAS  
HDGGKQALETVQRLLPVLCQAHGLTPAQVVAIASNGGGKQALETVQRLLPVLCQAHGL  
TPEQVVAIASNGGGKQALETVQRLLPVLCQAHGLTPEQVVAIASNGGGKQALETVQRL  
LPVLCQAHGLTPEQVVAIASNGGGKQALETVQRLLPVLCQAHGLTPEQVVAIAS

**ATP6-W<sub>68</sub>-L16**

LTPEQVVAIASNIGGKQALETVQRLLPVLCQAHGLTPDQVVAIASNIGGKQALETVQRL  
PVLCQAHGLTPDQVVAIASNIGGKQALETVQRLLPVLCQAHGLTPDQVVAIASHDGGK  
QALETVQRLLPVLCQAHGLTPAQVVAIASHDGGKQALETVQRLLPVLCQAHGLTPAQV  
VAIASNGGGKQALETVQRLLPVLCQAHGLTPEQVVAIASNIGGKQALETVQRLLPVLCQ  
AHGLTPDQVVAIASNIGGKQALETVQRLLPVLCQAHGLTPDQVVAIASNGGGKQALET  
VQRLLPVLCQAHGLTPEQVVAIASHDGGKQALETVQRLLPVLCQAHGLTPAQVVAIAS  
NIGGKQALETVQRLLPVLCQAHGLTPDQVVAIASNGGGKQALETVQRLLPVLCQAHGL  
TPEQVVAIASNIGGKQALETVQRLLPVLCQAHGLTPDQVVAIASNGGGKQALETVQRL  
PVLCQAHGLTPEQVVAIASHDGGKQALETVQRLLPVLCQAHGLTPAQVVAIASHDGGK  
QALETVQRLLPVLCQAHGLTPAQVVAIASNIGGKQALETVQRLLPVLCQAHGLTPDQV  
VAIASNGGGKQALETVQRLLPVLCQAHGLTPEQVVAIAS

**ATP6-W<sub>68</sub>-R17**

LTPEQVVAIASHDGGKQALETVQRLLPVLCQAHGLTPAQVVAIASNGGGKQALETVQR  
LLPVLCQAHGLTPEQVVAIASNGGGKQALETVQRLLPVLCQAHGLTPEQVVAIASNIGG  
KQALETVQRLLPVLCQAHGLTPDQVVAIASNIGGKQALETVQRLLPVLCQAHGLTPDQV  
VAIASNGGGKQALETVQRLLPVLCQAHGLTPEQVVAIASHDGGKQALETVQRLLPVLC  
QAHGLTPAQVVAIASHDGGKQALETVQRLLPVLCQAHGLTPAQVVAIASNGGGKQALET  
TVQRLLPVLCQAHGLTPEQVVAIASNIGGKQALETVQRLLPVLCQAHGLTPDQVVAIAS  
NGGGKQALETVQRLLPVLCQAHGLTPEQVVAIASNIGGKQALETVQRLLPVLCQAHGL  
TPDQVVAIASNIGGKQALETVQRLLPVLCQAHGLTPDQVVAIASNGGGKQALETVQRLL  
PVLCQAHGLTPEQVVAIASNGGGKQALETVQRLLPVLCQAHGLTPEQVVAIASNIGGKQ  
ALETVQRLLPVLCQAHGLTPDQVVAIASHDGGKQALETVQRLLPVLCQAHGLTPAQV  
VAIASNGGGKQALETVQRLLPVLCQAHGLTPEQVVAIAS

**CYTB-W<sub>77</sub>-L15**

LTPEQVVAIASNNGGKQALETVQRLLPVLCQAHGLTPEQVVAIASHDGGKQALETVQR  
LLPVLCQAHGLTPAQVVAIASHDGGKQALETVQRLLPVLCQAHGLTPAQVVAIASNNG  
GKQALETVQRLLPVLCQAHGLTPEQVVAIASNIGGKQALETVQRLLPVLCQAHGLTPDQ  
VVAIASNNGGKQALETVQRLLPVLCQAHGLTPEQVVAIASNIGGKQALETVQRLLPVLC  
QAHGLTPDQVVAIASHDGGKQALETVQRLLPVLCQAHGLTPAQVVAIASNNGGKQALE  
TVQRLLPVLCQAHGLTPEQVVAIASNGGGKQALETVQRLLPVLCQAHGLTPEQVVAIAS  
NIGGKQALETVQRLLPVLCQAHGLTPDQVVAIASNIGGKQALETVQRLLPVLCQAHGLT  
PDQVVAIASNIGGKQALETVQRLLPVLCQAHGLTPDQVVAIASHDGGKQALETVQRLLP  
VLCQAHGLTPAQVVAIASNGGGRPALESIVAQLSRPDPAL

**CYTB-W<sub>77</sub>-R13**

LTPEQVVAIASNGGGKQALETVQRLLPVLCQAHGLTPEQVVAIASNNGGKQALETVQR  
LLPVLCQAHGLTPEQVVAIASNNGGKQALETVQRLLPVLCQAHGLTPEQVVAIASHDGG  
KQALETVQRLLPVLCQAHGLTPAQVVAIASNNGGKQALETVQRLLPVLCQAHGLTPEQ  
VVAIASNGGGKQALETVQRLLPVLCQAHGLTPEQVVAIASNNGGKQALETVQRLLPVLC  
QAHGLTPEQVVAIASNGGGKQALETVQRLLPVLCQAHGLTPEQVVAIASNIGGKQALE  
TVQRLLPVLCQAHGLTPDQVVAIASNNGGKQALETVQRLLPVLCQAHGLTPEQVVAIAS  
NNGGKQALETVQRLLPVLCQAHGLTPEQVVAIASNGGGKQALETVQRLLPVLCQAHGL  
TPEQVVAIASNIGGKQALETVQRLLPVLCQAHGLTPDQVVAIASNGGGRPALESIVAQLS  
RPDPAL

**COX1-W<sub>126</sub>-L17**

LTPEQVVAIASNIGGKQALETVQRLLPVLCQAHGLTPDQVVAIASNNGGKQALETVQRL  
LPVLCQAHGLTPEQVVAIASNIGGKQALETVQRLLPVLCQAHGLTPDQVVAIASNIGGK  
QALETVQRLLPVLCQAHGLTPDQVVAIASNNGGKQALETVQRLLPVLCQAHGLTPEQV  
VAIASHDGGKQALETVQRLLPVLCQAHGLTPAQVVAIASNGGGKQALETVQRLLPVLC  
QAHGLTPEQVVAIASNNGGKQALETVQRLLPVLCQAHGLTPEQVVAIASNNGGKQALE  
TVQRLLPVLCQAHGLTPEQVVAIASNIGGKQALETVQRLLPVLCQAHGLTPDQVVAIAS  
NNGGKQALETVQRLLPVLCQAHGLTPEQVVAIASHDGGKQALETVQRLLPVLCQAHGL  
TPAQVVAIASNGGGKQALETVQRLLPVLCQAHGLTPEQVVAIASNNGGKQALETVQRL  
LPVLCQAHGLTPEQVVAIASNNGGKQALETVQRLLPVLCQAHGLTPEQVVAIASNIGGK  
QALETVQRLLPVLCQAHGLTPDQVVAIASNIGGRPALESIVAQLSRPDPAL

**COX1-W<sub>126</sub>-R17**

LTPEQVVAIASNGGGKQALETVQRLLPVLCQAHGLTPEQVVAIASHDGGKQALETVQR  
LLPVLCQAHGLTPAQVVAIASHDGGKQALETVQRLLPVLCQAHGLTPAQVVAIASNNG  
GKQALETVQRLLPVLCQAHGLTPEQVVAIASNNGGKQALETVQRLLPVLCQAHGLTPE  
QVVAIASHDGGKQALETVQRLLPVLCQAHGLTPAQVVAIASNGGGKQALETVQRLLPV  
LCQAHGLTPEQVVAIASNIGGKQALETVQRLLPVLCQAHGLTPDQVVAIASNIGGKQAL  
ETVQRLLPVLCQAHGLTPDQVVAIASNNGGKQALETVQRLLPVLCQAHGLTPEQVVAIA  
SNNGGKQALETVQRLLPVLCQAHGLTPEQVVAIASNNGGKQALETVQRLLPVLCQAHG  
LTPEQVVAIASNNGGKQALETVQRLLPVLCQAHGLTPEQVVAIASNNGGKQALETVQR  
LLPVLCQAHGLTPEQVVAIASNNGGKQALETVQRLLPVLCQAHGLTPEQVVAIASNIGG  
KQALETVQRLLPVLCQAHGLTPDQVVAIASNGGGRPALESIVAQLSRPDPAL

**COX2-W<sub>104</sub>-L19**

LTPEQVVAIASNIGGKQALETVQRLLPVLCQAHGLTPDQVVAIASNIGGKQALETVQRL  
PVLCQAHGLTPDQVVAIASHDGGKQALETVQRLLPVLCQAHGLTPAQVVAIASNIGGK  
QALETVQRLLPVLCQAHGLTPDQVVAIASNNGGKQALETVQRLLPVLCQAHGLTPEQV  
VAIASNGGGKQALETVQRLLPVLCQAHGLTPEQVVAIASNIGGKQALETVQRLLPVLCQ



AHGLTPDQVVAIASNIGGKQALETVQRLLPVLCQAHGLTPDQVVAIASNIGGKQALETV  
QRLLPVLCQAHGLTPDQVVAIASNNGGKQALETVQRLLPVLCQAHGLTPEQVVAIASNI  
GGKQALETVQRLLPVLCQAHGLTPDQVVAIASHDGGKQALETVQRLLPVLCQAHGLTP  
AQVVAIASNNGGKQALETVQRLLPVLCQAHGLTPEQVVAIASNIGGKQALETVQRLLPV  
LCQAHGLTPDQVVAIASNNGGKQALETVQRLLPVLCQAHGLTPEQVVAIASNIGGKQAL  
ETVQRLLPVLCQAHGLTPDQVVAIASNNGGKQALETVQRLLPVLCQAHGLTPEQVVAIA  
SNNGGKQALETVQRLLPVLCQAHGLTPEQVVAIASNIGGRPALESIVAQLSRPDPAL

**COX2-W<sub>104</sub>-R15**

LTPEQVVAIASHDGGKQALETVQRLLPVLCQAHGLTPAQVVAIASNIGGKQALETVQRL  
LPVLCQAHGLTPDQVVAIASNNGGKQALETVQRLLPVLCQAHGLTPEQVVAIASNNGG  
KQALETVQRLLPVLCQAHGLTPEQVVAIASNIGGKQALETVQRLLPVLCQAHGLTPDQV  
VAIASNNGGKQALETVQRLLPVLCQAHGLTPEQVVAIASNIGGKQALETVQRLLPVLCQ  
AHGLTPDQVVAIASNNGGKQALETVQRLLPVLCQAHGLTPEQVVAIASNNGGKQALET  
VQRLLPVLCQAHGLTPEQVVAIASHDGGKQALETVQRLLPVLCQAHGLTPAQVVAIAS  
NIGGKQALETVQRLLPVLCQAHGLTPDQVVAIASNNGGKQALETVQRLLPVLCQAHGL  
TPEQVVAIASNIGGKQALETVQRLLPVLCQAHGLTPDQVVAIASNNGGKQALETVQRL  
PVLCQAHGLTPEQVVAIASHDGGKQALETVQRLLPVLCQAHGLTPAQVVAIASNNGG  
PALESIVAQLSRPDPAL

**COX3-W<sub>57</sub>-L18**

LTPEQVVAIASNNGGKQALETVQRLLPVLCQAHGLTPEQVVAIASNIGGKQALETVQRL  
LPVLCQAHGLTPDQVVAIASHDGGKQALETVQRLLPVLCQAHGLTPAQVVAIASNIGGK  
QALETVQRLLPVLCQAHGLTPDQVVAIASNIGGKQALETVQRLLPVLCQAHGLTPDQV  
VAIASNIGGKQALETVQRLLPVLCQAHGLTPDQVVAIASHDGGKQALETVQRLLPVLCQA  
HGLTPAQVVAIASNIGGKQALETVQRLLPVLCQAHGLTPDQVVAIASNNGGKQALETV  
QRLLPVLCQAHGLTPEQVVAIASHDGGKQALETVQRLLPVLCQAHGLTPAQVVAIASH  
DGGKQALETVQRLLPVLCQAHGLTPAQVVAIASNNGGKQALETVQRLLPVLCQAHGLT  
PEQVVAIASNIGGKQALETVQRLLPVLCQAHGLTPDQVVAIASNIGGKQALETVQRLLP  
VLCQAHGLTPDQVVAIASHDGGKQALETVQRLLPVLCQAHGLTPAQVVAIASNNGGKQ  
ALETVQRLLPVLCQAHGLTPEQVVAIASNIGGKQALETVQRLLPVLCQAHGLTPDQVVA  
IASNNGGGRPALESIVAQLSRPDPAL

**COX3-W<sub>57</sub>-R17**

LTPEQVVAIASHDGGKQALETVQRLLPVLCQAHGLTPAQVVAIASHDGGKQALETVQR  
LLPVLCQAHGLTPAQVVAIASNNGGKQALETVQRLLPVLCQAHGLTPEQVVAIASNNG  
GKQALETVQRLLPVLCQAHGLTPEQVVAIASHDGGKQALETVQRLLPVLCQAHGLTPA  
QVVAIASNIGGKQALETVQRLLPVLCQAHGLTPDQVVAIASHDGGKQALETVQRLLPV  
LCQAHGLTPAQVVAIASNNGGKQALETVQRLLPVLCQAHGLTPEQVVAIASNNGGKQAL  
ETVQRLLPVLCQAHGLTPEQVVAIASNIGGKQALETVQRLLPVLCQAHGLTPDQVVAIA  
SNNGGKQALETVQRLLPVLCQAHGLTPEQVVAIASNNGGKQALETVQRLLPVLCQAHG  
LTPEQVVAIASNIGGKQALETVQRLLPVLCQAHGLTPDQVVAIASNNGGKQALETVQRL  
LPVLCQAHGLTPEQVVAIASNIGGKQALETVQRLLPVLCQAHGLTPDQVVAIASNNGGK  
QALETVQRLLPVLCQAHGLTPEQVVAIASHDGGRPALESIVAQLSRPDPAL

## Sequence S2.

### Amino acid sequences of ND1-W<sub>86</sub>-L-EGFP/R-mCherry-DdCBE.

Amino acid sequences of ND1-W<sub>86</sub>-L-EGFP/R-mCherry-DdCBE using for FASC are annotated as: green for EGFP, red for mCherry, italics for linker, pink for P2A, and purple for DdCBE.

#### ND1-W<sub>86</sub>-EGFP-L-DdCBE

MVSKGEELFTGVVPILVELDGDVNGHKFSVSGEGEGDATYGKLTCLKFICTTGKLPVWP  
TLVTTLTYGVQCFSRYPDHMKQHDFFKSAMPEGYVQERTIFFKDDGNYKTRAEVKFEG  
DTLVNRIELKGI~~DFKEDGNILGHKLEYNNSHN~~VYIMADKQKNGIKVNFKIRHNIEDGSV  
QLADHYQQNTPIGDGPVLLPDNH~~YLS~~TQSALSKDPNEKRDHMLLEFVTAAGITLGM~~D~~  
ELYK*GSGATNFSLLKQAGDVEENPGP*MLGFVGRVAAAPASGALRRLTPSASLPPAQLL  
RAAPTAVHPVRDYAAQTSSEGGGGSPGAAADYKDDDDKGSVDLRTLGYSSQQQEKIK  
PKVRS~~TVAQHHEALVGHGFT~~HAHIVALSQHPAALGTVAVKYQDMIAALPEATHEAIVG  
VGKQWSGARALEALLTVAGELRGPPLQLDTGQLLKI~~AKRGGVTA~~VEAVHAWRNALTG  
APLNLTP~~EQVVAIASN~~GGGKQALETVQRLLPVLCQA~~HGLTPEQVVAIASN~~GGKQALET  
VQRLLPVLCQA~~HGLTPDQVVAIASHD~~GGKQALETVQRLLPVLCQA~~HGLTPA~~QVVAIAS  
NIGGKQALETVQRLLPVLCQA~~HGLTPDQVVAIASHD~~GGKQALETVQRLLPVLCQA~~HGL~~  
TPAQVVAIASNGGGKQALETVQRLLPVLCQA~~HGLTPEQVVAIASN~~GGKQALETVQRL  
LPVLCQA~~HGLTPDQVVAIASN~~GGKQALETVQRLLPVLCQA~~HGLTPEQVVAIASHD~~GGK  
QALETVQRLLPVLCQA~~HGLTPA~~QVVAIASNGGGKQALETVQRLLPVLCQA~~HGLTPEQV~~  
VAIASHDGGKQALETVQRLLPVLCQA~~HGLTPA~~QVVAIASNGGGKQALETVQRLLPVLC  
QA~~HGLTPEQVVAIASN~~GGKQALETVQRLLPVLCQA~~HGLTPDQVVAIASN~~IGGRPALES  
VAQLSRPDPALAALTN~~DHLVALACL~~GGRPALDAVKKGLGGSPTYPNYANAGHVEGQ  
SALFMRDNGISEGLVFHNNPEGTCGFCVNM~~TETLLPENAKMTVVP~~PEGAIPV~~KRGATGE~~  
TKVFTGNSNSPKSPTKGGCSGGSTNLS~~DIIEKETGKQLVIQESILMLPEE~~VVEEVIGNK~~PESD~~  
ILVHTAYDESTDENVM~~LLTSDAPEYKPWALVIQDSNGENKIKMI~~

#### ND1-W<sub>86</sub>-mCherry-R-DdCBE

MVSKGEEDNMAIIKEFMRFKVHMEGSVNGHEFEIEGEGEGRPYEGTQTAKLKVTKGGP  
LPFAWDILSPQFMYGSKAYVKHPADIPDYLLKLSFPEGFKWERVMNPFEDGGVVTVTQDS  
SLQDGEFIYKVKLRGTNFPSDGPMQKKTMGWEASSERMYPEDGALKGEIKQRLK~~LKD~~  
GGHYDAEVKTTYKAKKPVQLPGA~~YNVNI~~KLDITSHNEDYTIVEQYERA~~EGRHSTGGMD~~  
ELYK*GSGATNFSLLKQAGDVEENPGP*MLGFVGRVAAAPASGALRRLTPSASLPPAQLL  
RAAPTAVHPVRDYAAQTSSEGGGGSPGAAADYKDDDDKGSVDLRTLGYSSQQQEKIK  
PKVRS~~TVAQHHEALVGHGFT~~HAHIVALSQHPAALGTVAVKYQDMIAALPEATHEAIVG  
VGKQWSGARALEALLTVAGELRGPPLQLDTGQLLKI~~AKRGGVTA~~VEAVHAWRNALTG  
APLNLTP~~EQVVAIASN~~GGGKQALETVQRLLPVLCQA~~HGLTPDQVVAIASN~~GGKQALET  
VQRLLPVLCQA~~HGLTPDQVVAIASN~~GGKQALETVQRLLPVLCQA~~HGLTPEQVVAIASN~~  
NGGKQALETVQRLLPVLCQA~~HGLTPEQVVAIASN~~GGKQALETVQRLLPVLCQA~~HGLT~~  
PEQVVAIASNNGGKQALETVQRLLPVLCQA~~HGLTPEQVVAIASN~~GGKQALETVQRLLP  
VLCQA~~HGLTPEQVVAIASN~~GGGKQALETVQRLLPVLCQA~~HGLTPEQVVAIASN~~GGKQ  
ALETVQRLLPVLCQA~~HGLTPEQVVAIASN~~GGKQALETVQRLLPVLCQA~~HGLTPDQVVA~~  
IASNNGGKQALETVQRLLPVLCQA~~HGLTPEQVVAIASN~~GGKQALETVQRLLPVLCQA  
HGLTPEQVVAIASNGGGKQALETVQRLLPVLCQA~~HGLTPEQVVAIASN~~GGKQALETVQ  
RLLPVLCQA~~HGLTPDQVVAIASN~~GGGKQALETVQRLLPVLCQA~~HGLTPEQVVAIASN~~  
GGKQALETVQRLLPVLCQA~~HGLTPEQVVAIASN~~GGGRPALESIVAQLSRPDPALAALTN  
DHLVALACLGGRPALDAVKKGLGGSASPTYPNYANAGHVEGQSALFMRDNGISEGLV  
FHNNPEGTCGFCVNM~~TETLLPENAKMTVVP~~PEGAIPV~~KRGATGET~~TKVFTGNSNSPKSPT

KGGCSGGSTNLSDIIEKETGKQLVIQESILMLPEEVEEVIGNKPESDILVHTAYDESTDEN  
VMLLTSDAPEYKPWALVIQDSNGENKIKML
